# Supplementary material for: Population extinctions driven by climate change, population size, and time since observation may make rare species databases inaccurate
Source: PLoS One. 2019 Oct 17;14(10):e0210378. doi: 10.1371/journal.pone.0210378 (PMC6797133; doi:10.1371/journal.pone.0210378)
Supplement: S2 File — (CSV) [file pone.0210378.s002.csv]

Population number	STATE	population size	Elevation (m)	year of observation	years since observation
1	CALIFORNIA	5	915.62	1982	34
2	CALIFORNIA	1	817.47	1981	35
3	CALIFORNIA	1	812.29	1981	35
4	CALIFORNIA	1	952.80	1981	35
5	CALIFORNIA	1	769.92	1981	35
6	CALIFORNIA	1	779.07	1981	35
7	CALIFORNIA	1	831.49	1981	35
8	CALIFORNIA	1	1223.77	1982	34
9	CALIFORNIA	1	549.86	1982	34
10	CALIFORNIA	1	486.77	1982	34
11	CALIFORNIA	1	1269.80	1982	34
12	CALIFORNIA	1	957.68	1982	34
13	CALIFORNIA	1	738.23	1982	34
14	CALIFORNIA	1	1628.55	1983	33
15	CALIFORNIA	1	1362.46	1988	28
16	CALIFORNIA	1	795.83	1991	25
17	CALIFORNIA	1	787.91	1991	25
18	CALIFORNIA	1	610.21	1991	25
19	CALIFORNIA	1	982.68	1991	25
20	CALIFORNIA	1	800.71	1991	25
21	CALIFORNIA	1	753.16	1991	25
22	CALIFORNIA	1	1626.72	1993	23
23	CALIFORNIA	1	1621.54	1993	23
24	CALIFORNIA	1	1013.76	1997	19
25	CALIFORNIA	1	1071.07	1997	19
26	CALIFORNIA	1	862.89	1998	18
27	CALIFORNIA	1	1198.17	1998	18
28	CALIFORNIA	1	1178.97	1999	17
29	CALIFORNIA	1	1198.78	1999	17
30	CALIFORNIA	1	904.04	2001	15
31	CALIFORNIA	1	999.74	2001	15
32	CALIFORNIA	1	908.61	2001	15
33	CALIFORNIA	1	999.74	2001	15
34	CALIFORNIA	1	925.68	2002	14
35	CALIFORNIA	1	1535.89	2003	13
36	CALIFORNIA	1	1099.41	2007	9
37	CALIFORNIA	1	1055.22	2011	5
38	CALIFORNIA	1	778.15	2012	4
39	CALIFORNIA	1	1452.07	2013	3
40	CALIFORNIA	1	1452.07	2013	3
41	CALIFORNIA	1	1158.85	2015	1
42	CALIFORNIA	2	723.29	1981	35
43	CALIFORNIA	2	874.17	1981	35
44	CALIFORNIA	2	1494.13	1981	35
45	CALIFORNIA	2	663.55	1981	35
46	CALIFORNIA	2	869.59	1981	35
47	CALIFORNIA	2	1412.14	1981	35
48	CALIFORNIA	2	1467.00	1981	35
49	CALIFORNIA	2	1051.26	1982	34
50	CALIFORNIA	2	1160.07	1983	33
51	CALIFORNIA	2	704.39	1985	31
52	CALIFORNIA	2	1548.99	1991	25
53	CALIFORNIA	2	933.91	1999	17
54	CALIFORNIA	2	1178.05	1999	17
55	CALIFORNIA	2	1218.29	2000	16
56	CALIFORNIA	2	1237.79	2000	16
57	CALIFORNIA	2	542.54	2002	14
58	CALIFORNIA	2	398.07	2004	12
59	CALIFORNIA	2	516.03	2008	8
60	CALIFORNIA	2	1694.08	2008	8
61	CALIFORNIA	2	1711.45	2008	8
62	CALIFORNIA	2	960.42	2008	8
63	CALIFORNIA	2	1268.27	2008	8
64	CALIFORNIA	2	1241.45	2009	7
65	CALIFORNIA	2	631.24	2011	5
66	CALIFORNIA	2	629.72	2011	5
67	CALIFORNIA	2	514.81	2012	4
68	CALIFORNIA	2	913.18	2014	2
69	CALIFORNIA	2	1223.47	2015	1
70	CALIFORNIA	3	1305.76	1980	36
71	CALIFORNIA	3	1103.38	1981	35
72	CALIFORNIA	3	1398.73	1981	35
73	CALIFORNIA	3	820.52	1981	35
74	CALIFORNIA	3	814.73	1981	35
75	CALIFORNIA	3	883.01	1981	35
76	CALIFORNIA	3	1487.42	1981	35
77	CALIFORNIA	3	943.66	1991	25
78	CALIFORNIA	3	1077.77	2000	16
79	CALIFORNIA	3	1196.95	2001	15
80	CALIFORNIA	3	1292.35	2001	15
81	CALIFORNIA	3	1345.69	2002	14
82	CALIFORNIA	3	898.86	2002	14
83	CALIFORNIA	3	390.75	2004	12
84	CALIFORNIA	3	503.53	2015	1
85	CALIFORNIA	3	1129.59	2015	1
86	CALIFORNIA	4	965.30	1980	36
87	CALIFORNIA	4	983.59	1980	36
88	CALIFORNIA	4	1342.95	1981	35
89	CALIFORNIA	4	1118.31	1981	35
90	CALIFORNIA	4	1422.81	1981	35
91	CALIFORNIA	4	1197.25	1983	33
92	CALIFORNIA	4	609.30	1983	33
93	CALIFORNIA	4	1292.05	1987	29
94	CALIFORNIA	4	933.30	1988	28
95	CALIFORNIA	4	1134.47	1989	27
96	CALIFORNIA	4	805.28	1991	25
97	CALIFORNIA	4	749.81	1991	25
98	CALIFORNIA	4	1317.35	1993	23
99	CALIFORNIA	4	840.03	1995	21
100	CALIFORNIA	4	877.21	1995	21
101	CALIFORNIA	4	1268.27	1996	20
102	CALIFORNIA	4	683.67	1996	20
103	CALIFORNIA	4	1346.00	1996	20
104	CALIFORNIA	4	1388.36	2000	16
105	CALIFORNIA	4	1290.83	2003	13
106	CALIFORNIA	4	871.73	2005	11
107	CALIFORNIA	4	1052.47	2005	11
108	CALIFORNIA	4	420.01	2005	11
109	CALIFORNIA	4	750.42	2007	9
110	CALIFORNIA	4	757.12	2007	9
111	CALIFORNIA	4	721.46	2010	6
112	CALIFORNIA	4	419.10	2015	1
113	CALIFORNIA	5	1101.85	1979	37
114	CALIFORNIA	5	1000.66	1981	35
115	CALIFORNIA	5	1149.71	1981	35
116	CALIFORNIA	5	1073.20	1981	35
117	CALIFORNIA	5	1534.36	1982	34
118	CALIFORNIA	5	1348.13	1982	34
119	CALIFORNIA	5	1121.05	1982	34
120	CALIFORNIA	5	1536.80	1982	34
121	CALIFORNIA	5	913.18	1983	33
122	CALIFORNIA	5	950.67	1983	33
123	CALIFORNIA	5	937.87	1983	33
124	CALIFORNIA	5	922.63	1983	33
125	CALIFORNIA	5	1151.23	1983	33
126	CALIFORNIA	5	1273.76	1983	33
127	CALIFORNIA	5	1094.84	1983	33
128	CALIFORNIA	5	769.62	1983	33
129	CALIFORNIA	5	1089.66	1991	25
130	CALIFORNIA	5	859.84	1991	25
131	CALIFORNIA	5	1271.93	1996	20
132	CALIFORNIA	5	1173.18	1997	19
133	CALIFORNIA	5	1078.08	1998	18
134	CALIFORNIA	5	860.76	1999	17
135	CALIFORNIA	5	1239.62	2000	16
136	CALIFORNIA	5	1235.35	2000	16
137	CALIFORNIA	5	1229.87	2000	16
138	CALIFORNIA	5	1257.60	2000	16
139	CALIFORNIA	5	1051.26	2001	15
140	CALIFORNIA	5	1067.71	2001	15
141	CALIFORNIA	5	1131.72	2002	14
142	CALIFORNIA	5	759.87	2003	13
143	CALIFORNIA	5	774.19	2007	9
144	CALIFORNIA	5	503.53	2008	8
145	CALIFORNIA	5	847.34	2010	6
146	CALIFORNIA	5	1411.53	2012	4
147	CALIFORNIA	5	904.95	2012	4
148	CALIFORNIA	5	1411.53	2012	4
149	CALIFORNIA	5	1210.67	2015	1
150	CALIFORNIA	6	1390.19	1980	36
151	CALIFORNIA	6	1579.17	1981	35
152	CALIFORNIA	6	750.42	1983	33
153	CALIFORNIA	6	1609.95	1991	25
154	CALIFORNIA	6	1358.19	1991	25
155	CALIFORNIA	6	1123.19	1991	25
156	CALIFORNIA	6	1086.61	2000	16
157	CALIFORNIA	6	1102.16	2000	16
158	CALIFORNIA	6	1362.76	2001	15
159	CALIFORNIA	6	1373.43	2004	12
160	CALIFORNIA	6	1156.41	2008	8
161	CALIFORNIA	7	1346.30	1997	19
162	CALIFORNIA	7	1222.25	2000	16
163	CALIFORNIA	7	701.34	2002	14
164	CALIFORNIA	7	665.07	2002	14
165	CALIFORNIA	7	1326.79	2004	12
166	CALIFORNIA	7	928.12	2008	8
167	CALIFORNIA	8	1156.11	1991	25
168	CALIFORNIA	8	1195.12	1998	18
169	CALIFORNIA	8	1366.72	2001	15
170	CALIFORNIA	8	640.99	2004	12
171	CALIFORNIA	8	1376.17	2005	11
172	CALIFORNIA	8	1203.96	2013	3
173	CALIFORNIA	8	1195.73	2013	3
174	CALIFORNIA	9	917.14	1991	25
175	CALIFORNIA	9	980.24	1991	25
176	CALIFORNIA	10	1105.81	1980	36
177	CALIFORNIA	10	1221.94	1981	35
178	CALIFORNIA	10	1115.26	1982	34
179	CALIFORNIA	10	1061.31	1988	28
180	CALIFORNIA	10	1075.94	1991	25
181	CALIFORNIA	10	1061.62	1995	21
182	CALIFORNIA	10	1089.96	2000	16
183	CALIFORNIA	11	1705.66	1991	25
184	CALIFORNIA	11	1711.76	1991	25
185	CALIFORNIA	11	915.62	1991	25
186	CALIFORNIA	11	732.13	2003	13
187	CALIFORNIA	11	770.53	2008	8
188	CALIFORNIA	11	589.79	2008	8
189	CALIFORNIA	12	1114.04	1981	35
190	CALIFORNIA	12	1105.51	1981	35
191	CALIFORNIA	12	1213.41	1982	34
192	CALIFORNIA	12	1158.24	1982	34
193	CALIFORNIA	12	1319.48	2006	10
194	CALIFORNIA	12	1335.94	2008	8
195	CALIFORNIA	13	1110.39	1981	35
196	CALIFORNIA	13	772.36	1981	35
197	CALIFORNIA	14	995.78	2008	8
198	CALIFORNIA	15	1218.29	1989	27
199	CALIFORNIA	15	895.50	1996	20
200	CALIFORNIA	15	1281.99	1996	20
201	CALIFORNIA	15	823.26	1996	20
202	CALIFORNIA	15	1038.76	2008	8
203	CALIFORNIA	16	1573.07	1993	23
204	CALIFORNIA	16	1579.78	1993	23
205	CALIFORNIA	16	1309.42	2003	13
206	CALIFORNIA	16	645.26	2012	4
207	CALIFORNIA	17	1364.28	2006	10
208	CALIFORNIA	20	1086.31	1981	35
209	CALIFORNIA	20	1104.90	1981	35
210	CALIFORNIA	20	557.78	1991	25
211	CALIFORNIA	20	1240.84	1991	25
212	CALIFORNIA	20	1574.29	1996	20
213	CALIFORNIA	20	1577.64	2009	7
214	CALIFORNIA	21	481.89	2008	8
215	CALIFORNIA	22	940.00	2003	13
216	CALIFORNIA	23	939.70	1991	25
217	CALIFORNIA	23	1383.79	2012	4
218	CALIFORNIA	23	1383.79	2012	4
219	CALIFORNIA	24	919.28	1983	33
220	CALIFORNIA	24	1707.18	1991	25
221	CALIFORNIA	24	1682.19	1991	25
222	CALIFORNIA	24	324.00	2003	13
223	CALIFORNIA	26	1226.52	2000	16
224	CALIFORNIA	26	1249.38	2000	16
225	CALIFORNIA	27	1159.46	1997	19
226	CALIFORNIA	28	498.35	1982	34
227	CALIFORNIA	29	1047.90	1988	28
228	CALIFORNIA	30	985.11	1981	35
229	CALIFORNIA	32	681.84	2003	13
230	CALIFORNIA	32	685.80	2003	13
231	CALIFORNIA	32	641.30	2004	12
232	CALIFORNIA	33	1027.18	2015	1
233	CALIFORNIA	34	1582.22	1997	19
234	CALIFORNIA	34	1602.64	2008	8
235	CALIFORNIA	36	1111.91	1991	25
236	CALIFORNIA	36	1224.99	2012	4
237	CALIFORNIA	36	1220.11	2012	4
238	CALIFORNIA	37	894.59	1981	35
239	CALIFORNIA	38	513.28	2015	1
240	CALIFORNIA	39	513.59	2007	9
241	CALIFORNIA	39	1141.48	2012	4
242	CALIFORNIA	40	1304.85	2006	10
243	CALIFORNIA	41	631.24	2000	16
244	CALIFORNIA	41	634.90	2000	16
245	CALIFORNIA	45	1344.17	1981	35
246	CALIFORNIA	45	396.24	1981	35
247	CALIFORNIA	48	669.34	2006	10
248	CALIFORNIA	50	1620.93	1981	35
249	CALIFORNIA	50	1648.05	1988	28
250	CALIFORNIA	52	1528.88	1991	25
251	CALIFORNIA	54	981.15	1991	25
252	CALIFORNIA	60	1102.77	1989	27
253	CALIFORNIA	65	1030.83	1991	25
254	CALIFORNIA	65	1023.82	1991	25
255	CALIFORNIA	66	1202.44	2008	8
256	CALIFORNIA	68	1029.61	1991	25
257	CALIFORNIA	68	1023.52	1991	25
258	CALIFORNIA	71	877.82	2013	3
259	CALIFORNIA	72	1151.53	2002	14
260	CALIFORNIA	73	891.54	2008	8
261	CALIFORNIA	75	1532.84	1982	34
262	CALIFORNIA	77	1164.03	2003	13
263	CALIFORNIA	80	366.98	1984	32
264	CALIFORNIA	84	1008.28	2007	9
265	CALIFORNIA	87	1617.88	1991	25
266	CALIFORNIA	88	1600.50	2004	12
267	CALIFORNIA	88	1620.32	2004	12
268	CALIFORNIA	109	1544.73	1991	25
269	CALIFORNIA	151	1303.63	1991	25
270	CALIFORNIA	204	1565.76	2013	3
271	CALIFORNIA	204	1552.96	2013	3
272	CALIFORNIA	210	1534.36	2013	3
273	CALIFORNIA	210	1536.80	2013	3
274	CALIFORNIA	1	1533.14	1995	21
275	CALIFORNIA	29	1280.77	2014	2
276	CALIFORNIA	45	1487.12	2013	3
277	CALIFORNIA	45	1487.12	2013	3
278	CALIFORNIA	50	1564.84	2001	15
279	CALIFORNIA	60	1500.23	1996	20
280	CALIFORNIA	173	1491.69	2013	3
281	CALIFORNIA	173	1497.18	2013	3
282	CALIFORNIA	380	1481.02	2007	9
283	CALIFORNIA	1	1297.53	1999	17
284	CALIFORNIA	1	1257.91	1999	17
285	CALIFORNIA	1	1276.20	1999	17
286	CALIFORNIA	1	1321.92	1999	17
287	CALIFORNIA	1	1312.47	1999	17
288	CALIFORNIA	1	1312.77	1999	17
289	CALIFORNIA	1	1249.68	1999	17
290	CALIFORNIA	1	1242.97	1999	17
291	CALIFORNIA	1	1074.42	2001	15
292	CALIFORNIA	1	1475.84	2002	14
293	CALIFORNIA	1	1407.87	2002	14
294	CALIFORNIA	1	1645.92	2002	14
295	CALIFORNIA	1	1640.43	2002	14
296	CALIFORNIA	1	1479.50	2004	12
297	CALIFORNIA	1	1387.45	2009	7
298	CALIFORNIA	1	1560.27	2009	7
299	CALIFORNIA	1	1344.17	2010	6
300	CALIFORNIA	2	1310.34	1999	17
301	CALIFORNIA	2	1296.62	1999	17
302	CALIFORNIA	2	1668.17	2002	14
303	CALIFORNIA	2	1260.35	2009	7
304	CALIFORNIA	2	1522.48	2010	6
305	CALIFORNIA	2	1552.04	2011	5
306	CALIFORNIA	3	1257.00	1999	17
307	CALIFORNIA	3	1274.06	1999	17
308	CALIFORNIA	3	1667.26	2001	15
309	CALIFORNIA	3	1306.98	2001	15
310	CALIFORNIA	3	1549.60	2001	15
311	CALIFORNIA	3	1280.77	2002	14
312	CALIFORNIA	3	1368.86	2009	7
313	CALIFORNIA	3	1416.41	2010	6
314	CALIFORNIA	3	1405.13	2010	6
315	CALIFORNIA	3	1561.80	2011	5
316	CALIFORNIA	4	1373.12	2000	16
317	CALIFORNIA	4	1078.08	2001	15
318	CALIFORNIA	4	1708.40	2002	14
319	CALIFORNIA	4	1713.89	2002	14
320	CALIFORNIA	4	1406.35	2009	7
321	CALIFORNIA	4	1440.18	2009	7
322	CALIFORNIA	4	1679.75	2009	7
323	CALIFORNIA	4	1364.59	2010	6
324	CALIFORNIA	4	1269.19	2011	5
325	CALIFORNIA	5	1422.50	1999	17
326	CALIFORNIA	5	1462.43	2001	15
327	CALIFORNIA	5	1645.92	2002	14
328	CALIFORNIA	5	1708.40	2002	14
329	CALIFORNIA	5	1642.57	2002	14
330	CALIFORNIA	5	1281.38	2002	14
331	CALIFORNIA	5	1470.96	2002	14
332	CALIFORNIA	5	1463.04	2002	14
333	CALIFORNIA	5	1408.18	2002	14
334	CALIFORNIA	5	1738.88	2002	14
335	CALIFORNIA	5	1594.10	2009	7
336	CALIFORNIA	6	1225.60	1999	17
337	CALIFORNIA	6	1238.40	1999	17
338	CALIFORNIA	6	1316.43	1999	17
339	CALIFORNIA	6	1192.99	1999	17
340	CALIFORNIA	6	1177.14	2010	6
341	CALIFORNIA	6	1417.32	2010	6
342	CALIFORNIA	7	1517.60	2004	12
343	CALIFORNIA	7	999.13	2011	5
344	CALIFORNIA	7	1260.96	2011	5
345	CALIFORNIA	7	1463.34	2014	2
346	CALIFORNIA	7	1580.69	2014	2
347	CALIFORNIA	8	1284.43	1999	17
348	CALIFORNIA	8	1284.73	1999	17
349	CALIFORNIA	9	1307.59	1999	17
350	CALIFORNIA	9	1411.22	2002	14
351	CALIFORNIA	9	1037.23	2010	6
352	CALIFORNIA	9	1133.25	2011	5
353	CALIFORNIA	10	1299.36	1999	17
354	CALIFORNIA	10	1314.30	1999	17
355	CALIFORNIA	10	1183.23	1999	17
356	CALIFORNIA	10	1193.90	1999	17
357	CALIFORNIA	10	1227.12	2002	14
358	CALIFORNIA	10	1288.39	2011	5
359	CALIFORNIA	10	1183.54	2011	5
360	CALIFORNIA	11	1719.99	2000	16
361	CALIFORNIA	12	1128.37	2002	14
362	CALIFORNIA	12	1178.36	2010	6
363	CALIFORNIA	13	1547.16	2011	5
364	CALIFORNIA	14	1137.51	2010	6
365	CALIFORNIA	14	1216.46	2011	5
366	CALIFORNIA	16	1757.78	2001	15
367	CALIFORNIA	16	1267.97	2011	5
368	CALIFORNIA	17	1599.90	2004	12
369	CALIFORNIA	17	1469.44	2004	12
370	CALIFORNIA	17	1611.17	2004	12
371	CALIFORNIA	18	1063.45	2001	15
372	CALIFORNIA	20	1180.19	2004	12
373	CALIFORNIA	20	1293.88	2014	2
374	CALIFORNIA	21	1509.06	2011	5
375	CALIFORNIA	22	1318.56	2001	15
376	CALIFORNIA	22	1560.27	2010	6
377	CALIFORNIA	23	1042.72	2011	5
378	CALIFORNIA	25	1777.29	2004	12
379	CALIFORNIA	25	1329.54	2010	6
380	CALIFORNIA	27	1268.58	1999	17
381	CALIFORNIA	29	1398.42	2010	6
382	CALIFORNIA	32	1608.43	2001	15
383	CALIFORNIA	32	1524.91	2010	6
384	CALIFORNIA	34	1819.66	2001	15
385	CALIFORNIA	38	1229.26	2011	5
386	CALIFORNIA	40	1769.67	1999	17
387	CALIFORNIA	40	1740.71	1999	17
388	CALIFORNIA	40	1560.88	2001	15
389	CALIFORNIA	40	1139.95	2010	6
390	CALIFORNIA	41	1823.31	2001	15
391	CALIFORNIA	41	1718.16	2001	15
392	CALIFORNIA	51	1382.27	2000	16
393	CALIFORNIA	53	1438.35	2009	7
394	CALIFORNIA	54	1129.28	2010	6
395	CALIFORNIA	57	1513.64	2001	15
396	CALIFORNIA	57	1336.55	2004	12
397	CALIFORNIA	58	1525.83	2001	15
398	CALIFORNIA	61	1502.05	2009	7
399	CALIFORNIA	62	1333.50	2009	7
400	CALIFORNIA	63	1571.24	2001	15
401	CALIFORNIA	65	1307.59	1999	17
402	CALIFORNIA	66	1526.44	2011	5
403	CALIFORNIA	75	1313.99	2001	15
404	CALIFORNIA	100	1316.74	1999	17
405	CALIFORNIA	127	1619.71	2001	15
406	CALIFORNIA	159	1798.93	2001	15
407	CALIFORNIA	1	1053.39	1982	34
408	CALIFORNIA	1	971.40	1982	34
409	CALIFORNIA	1	1463.65	1983	33
410	CALIFORNIA	1	1692.25	1983	33
411	CALIFORNIA	1	1372.21	1984	32
412	CALIFORNIA	1	1356.36	1984	32
413	CALIFORNIA	1	1440.18	1985	31
414	CALIFORNIA	1	1807.77	1989	27
415	CALIFORNIA	1	1645.62	1989	27
416	CALIFORNIA	1	1532.23	1989	27
417	CALIFORNIA	1	932.38	1990	26
418	CALIFORNIA	1	925.37	1990	26
419	CALIFORNIA	1	1226.52	1991	25
420	CALIFORNIA	1	1107.03	1992	24
421	CALIFORNIA	1	1062.53	1992	24
422	CALIFORNIA	1	1130.50	1994	22
423	CALIFORNIA	1	1128.67	1994	22
424	CALIFORNIA	1	1208.23	1998	18
425	CALIFORNIA	1	1209.75	1998	18
426	CALIFORNIA	1	1200.30	2002	14
427	CALIFORNIA	1	1393.24	2002	14
428	CALIFORNIA	1	1201.22	2002	14
429	CALIFORNIA	1	1216.15	2003	13
430	CALIFORNIA	1	1659.64	2004	12
431	CALIFORNIA	1	1588.62	2004	12
432	CALIFORNIA	1	1658.11	2004	12
433	CALIFORNIA	1	1659.64	2004	12
434	CALIFORNIA	1	1431.65	2005	11
435	CALIFORNIA	1	1442.92	2005	11
436	CALIFORNIA	1	1434.39	2006	10
437	CALIFORNIA	1	1431.65	2009	7
438	CALIFORNIA	1	1526.74	2009	7
439	CALIFORNIA	1	1682.50	2009	7
440	CALIFORNIA	1	1687.68	2009	7
441	CALIFORNIA	1	1634.34	2009	7
442	CALIFORNIA	1	1545.95	2009	7
443	CALIFORNIA	1	1435.30	2009	7
444	CALIFORNIA	1	1593.80	2009	7
445	CALIFORNIA	1	1575.82	2013	3
446	CALIFORNIA	1	1572.16	2013	3
447	CALIFORNIA	1	1367.03	2015	1
448	CALIFORNIA	1	1321.31	2015	1
449	CALIFORNIA	1	1516.08	2015	1
450	CALIFORNIA	1	1187.20	2015	1
451	CALIFORNIA	1	1440.48	2015	1
452	CALIFORNIA	1	1646.83	2015	1
453	CALIFORNIA	2	1504.19	1982	34
454	CALIFORNIA	2	1393.24	1982	34
455	CALIFORNIA	2	776.94	1982	34
456	CALIFORNIA	2	1487.42	1982	34
457	CALIFORNIA	2	1393.85	1982	34
458	CALIFORNIA	2	1613.92	1984	32
459	CALIFORNIA	2	1039.98	1984	32
460	CALIFORNIA	2	1046.68	1984	32
461	CALIFORNIA	2	1463.65	1985	31
462	CALIFORNIA	2	1044.85	1985	31
463	CALIFORNIA	2	1037.84	1985	31
464	CALIFORNIA	2	1469.14	1985	31
465	CALIFORNIA	2	1600.20	1986	30
466	CALIFORNIA	2	1665.12	1989	27
467	CALIFORNIA	2	1424.94	1989	27
468	CALIFORNIA	2	1420.98	1989	27
469	CALIFORNIA	2	1199.69	1992	24
470	CALIFORNIA	2	1077.47	1994	22
471	CALIFORNIA	2	1097.89	1994	22
472	CALIFORNIA	2	1071.98	1994	22
473	CALIFORNIA	2	1099.11	1994	22
474	CALIFORNIA	2	1564.54	1996	20
475	CALIFORNIA	2	1203.05	1998	18
476	CALIFORNIA	2	1421.89	2001	15
477	CALIFORNIA	2	1411.83	2001	15
478	CALIFORNIA	2	1624.89	2001	15
479	CALIFORNIA	2	1618.18	2001	15
480	CALIFORNIA	2	1618.18	2001	15
481	CALIFORNIA	2	1623.06	2001	15
482	CALIFORNIA	2	1416.41	2001	15
483	CALIFORNIA	2	1402.38	2001	15
484	CALIFORNIA	2	1203.35	2002	14
485	CALIFORNIA	2	1180.80	2005	11
486	CALIFORNIA	2	1104.60	2006	10
487	CALIFORNIA	2	1428.60	2009	7
488	CALIFORNIA	2	1381.35	2009	7
489	CALIFORNIA	2	1466.70	2009	7
490	CALIFORNIA	2	1461.52	2013	3
491	CALIFORNIA	2	1516.99	2013	3
492	CALIFORNIA	2	1204.87	2015	1
493	CALIFORNIA	2	1725.47	2015	1
494	CALIFORNIA	3	1141.17	1982	34
495	CALIFORNIA	3	1365.20	1982	34
496	CALIFORNIA	3	1372.21	1982	34
497	CALIFORNIA	3	1144.52	1982	34
498	CALIFORNIA	3	1609.04	1983	33
499	CALIFORNIA	3	1608.12	1983	33
500	CALIFORNIA	3	1432.56	1984	32
501	CALIFORNIA	3	1730.65	1989	27
502	CALIFORNIA	3	1595.93	1989	27
503	CALIFORNIA	3	1158.85	1994	22
504	CALIFORNIA	3	1161.59	1994	22
505	CALIFORNIA	3	1566.37	2001	15
506	CALIFORNIA	3	1569.11	2001	15
507	CALIFORNIA	3	1059.48	2002	14
508	CALIFORNIA	3	1310.34	2002	14
509	CALIFORNIA	3	1393.85	2002	14
510	CALIFORNIA	3	1298.14	2002	14
511	CALIFORNIA	3	1254.56	2002	14
512	CALIFORNIA	3	1033.27	2002	14
513	CALIFORNIA	3	1299.06	2002	14
514	CALIFORNIA	3	1254.56	2002	14
515	CALIFORNIA	3	1310.34	2002	14
516	CALIFORNIA	3	1504.49	2006	10
517	CALIFORNIA	3	1196.64	2007	9
518	CALIFORNIA	3	1424.33	2009	7
519	CALIFORNIA	3	1471.57	2009	7
520	CALIFORNIA	3	1702.92	2009	7
521	CALIFORNIA	3	1444.45	2009	7
522	CALIFORNIA	3	1468.83	2009	7
523	CALIFORNIA	3	1581.91	2013	3
524	CALIFORNIA	3	1615.74	2013	3
525	CALIFORNIA	3	1365.81	2015	1
526	CALIFORNIA	3	1281.68	2015	1
527	CALIFORNIA	3	1210.06	2015	1
528	CALIFORNIA	3	1633.42	2015	1
529	CALIFORNIA	3	1400.56	2015	1
530	CALIFORNIA	4	1058.88	1983	33
531	CALIFORNIA	4	1137.51	1994	22
532	CALIFORNIA	4	1137.21	1994	22
533	CALIFORNIA	4	1637.39	2000	16
534	CALIFORNIA	4	1642.57	2000	16
535	CALIFORNIA	4	1630.07	2001	15
536	CALIFORNIA	4	1621.23	2001	15
537	CALIFORNIA	4	1388.67	2002	14
538	CALIFORNIA	4	1483.16	2009	7
539	CALIFORNIA	4	1638.60	2009	7
540	CALIFORNIA	4	1557.53	2009	7
541	CALIFORNIA	4	1592.88	2009	7
542	CALIFORNIA	4	1487.73	2013	3
543	CALIFORNIA	5	1094.84	1981	35
544	CALIFORNIA	5	1106.12	1981	35
545	CALIFORNIA	5	769.92	1982	34
546	CALIFORNIA	5	1252.12	1982	34
547	CALIFORNIA	5	1128.37	1982	34
548	CALIFORNIA	5	1469.44	1983	33
549	CALIFORNIA	5	1395.07	1984	32
550	CALIFORNIA	5	1376.78	1984	32
551	CALIFORNIA	5	1200.00	1985	31
552	CALIFORNIA	5	1127.76	1997	19
553	CALIFORNIA	5	1289.00	2002	14
554	CALIFORNIA	5	1366.11	2002	14
555	CALIFORNIA	5	1343.56	2002	14
556	CALIFORNIA	5	1343.56	2002	14
557	CALIFORNIA	5	1289.00	2002	14
558	CALIFORNIA	5	1365.20	2002	14
559	CALIFORNIA	5	1204.87	2007	9
560	CALIFORNIA	5	1382.57	2007	9
561	CALIFORNIA	5	1382.57	2007	9
562	CALIFORNIA	5	1437.44	2009	7
563	CALIFORNIA	5	1677.31	2009	7
564	CALIFORNIA	5	1596.24	2009	7
565	CALIFORNIA	5	1524.91	2009	7
566	CALIFORNIA	5	1516.38	2009	7
567	CALIFORNIA	5	1451.15	2009	7
568	CALIFORNIA	5	1583.74	2009	7
569	CALIFORNIA	5	1431.65	2009	7
570	CALIFORNIA	5	1381.35	2010	6
571	CALIFORNIA	5	1381.35	2010	6
572	CALIFORNIA	5	1568.50	2011	5
573	CALIFORNIA	5	1511.50	2013	3
574	CALIFORNIA	5	1594.71	2015	1
575	CALIFORNIA	5	1370.69	2015	1
576	CALIFORNIA	5	1219.20	2015	1
577	CALIFORNIA	6	1664.51	1983	33
578	CALIFORNIA	6	1667.56	1983	33
579	CALIFORNIA	6	1329.23	1984	32
580	CALIFORNIA	6	1466.09	1984	32
581	CALIFORNIA	6	1580.08	1989	27
582	CALIFORNIA	6	1365.50	1996	20
583	CALIFORNIA	6	1565.15	2001	15
584	CALIFORNIA	6	1570.02	2001	15
585	CALIFORNIA	6	1389.58	2009	7
586	CALIFORNIA	6	1483.46	2009	7
587	CALIFORNIA	6	1495.35	2009	7
588	CALIFORNIA	6	1630.07	2009	7
589	CALIFORNIA	6	1630.38	2009	7
590	CALIFORNIA	6	1604.47	2009	7
591	CALIFORNIA	6	1420.67	2009	7
592	CALIFORNIA	6	1363.07	2009	7
593	CALIFORNIA	6	1253.95	2012	4
594	CALIFORNIA	6	1254.25	2012	4
595	CALIFORNIA	6	1351.48	2014	2
596	CALIFORNIA	6	1420.67	2015	1
597	CALIFORNIA	7	1579.17	1980	36
598	CALIFORNIA	7	1058.27	1983	33
599	CALIFORNIA	7	1060.09	1983	33
600	CALIFORNIA	7	1299.97	1989	27
601	CALIFORNIA	7	1360.32	1989	27
602	CALIFORNIA	7	1522.17	1996	20
603	CALIFORNIA	7	1585.87	1997	19
604	CALIFORNIA	7	1587.09	1997	19
605	CALIFORNIA	7	1582.52	2000	16
606	CALIFORNIA	7	1423.11	2001	15
607	CALIFORNIA	7	1423.11	2001	15
608	CALIFORNIA	7	1397.51	2002	14
609	CALIFORNIA	7	1171.35	2003	13
610	CALIFORNIA	7	1458.16	2004	12
611	CALIFORNIA	7	1210.36	2007	9
612	CALIFORNIA	7	1782.78	2007	9
613	CALIFORNIA	7	1140.56	2009	7
614	CALIFORNIA	7	1506.93	2009	7
615	CALIFORNIA	7	1484.99	2009	7
616	CALIFORNIA	7	1592.58	2009	7
617	CALIFORNIA	7	1548.08	2009	7
618	CALIFORNIA	7	1377.70	2009	7
619	CALIFORNIA	7	1140.56	2009	7
620	CALIFORNIA	7	1559.66	2013	3
621	CALIFORNIA	7	1591.97	2013	3
622	CALIFORNIA	7	1557.22	2013	3
623	CALIFORNIA	7	1460.91	2015	1
624	CALIFORNIA	7	1445.67	2015	1
625	CALIFORNIA	8	1341.12	1991	25
626	CALIFORNIA	8	1568.50	1996	20
627	CALIFORNIA	8	1513.94	1996	20
628	CALIFORNIA	8	1210.67	1998	18
629	CALIFORNIA	8	1511.20	2000	16
630	CALIFORNIA	8	1513.33	2000	16
631	CALIFORNIA	8	1318.26	2002	14
632	CALIFORNIA	8	1445.06	2005	11
633	CALIFORNIA	8	1524.00	2005	11
634	CALIFORNIA	8	1206.09	2007	9
635	CALIFORNIA	8	1513.94	2009	7
636	CALIFORNIA	8	1468.83	2009	7
637	CALIFORNIA	8	1425.55	2009	7
638	CALIFORNIA	8	1534.36	2009	7
639	CALIFORNIA	8	1407.26	2009	7
640	CALIFORNIA	8	1666.65	2013	3
641	CALIFORNIA	8	1551.13	2013	3
642	CALIFORNIA	8	1531.92	2013	3
643	CALIFORNIA	8	1588.01	2013	3
644	CALIFORNIA	8	1600.20	2013	3
645	CALIFORNIA	8	1624.89	2015	1
646	CALIFORNIA	8	1642.57	2015	1
647	CALIFORNIA	9	1385.62	1984	32
648	CALIFORNIA	9	1410.92	1984	32
649	CALIFORNIA	9	1427.99	1984	32
650	CALIFORNIA	9	1582.22	1990	26
651	CALIFORNIA	9	1509.37	1992	24
652	CALIFORNIA	9	1595.32	1992	24
653	CALIFORNIA	9	717.80	1993	23
654	CALIFORNIA	9	733.65	1993	23
655	CALIFORNIA	9	1440.79	2004	12
656	CALIFORNIA	9	1457.25	2006	10
657	CALIFORNIA	9	1709.62	2006	10
658	CALIFORNIA	9	1779.42	2007	9
659	CALIFORNIA	9	1658.42	2009	7
660	CALIFORNIA	9	1667.26	2009	7
661	CALIFORNIA	9	1590.75	2009	7
662	CALIFORNIA	9	1657.81	2009	7
663	CALIFORNIA	9	1498.40	2009	7
664	CALIFORNIA	9	1658.42	2009	7
665	CALIFORNIA	9	1456.94	2013	3
666	CALIFORNIA	10	1522.17	1984	32
667	CALIFORNIA	10	1364.89	1984	32
668	CALIFORNIA	10	1491.69	1984	32
669	CALIFORNIA	10	1572.16	1988	28
670	CALIFORNIA	10	1251.20	1989	27
671	CALIFORNIA	10	1255.17	1989	27
672	CALIFORNIA	10	1462.13	1992	24
673	CALIFORNIA	10	1481.33	1992	24
674	CALIFORNIA	10	1591.67	1994	22
675	CALIFORNIA	10	1586.48	1994	22
676	CALIFORNIA	10	1364.89	1996	20
677	CALIFORNIA	10	1457.86	1996	20
678	CALIFORNIA	10	1448.41	1996	20
679	CALIFORNIA	10	1196.04	1998	18
680	CALIFORNIA	10	1460.91	1998	18
681	CALIFORNIA	10	1195.43	1998	18
682	CALIFORNIA	10	1609.34	2001	15
683	CALIFORNIA	10	1609.34	2001	15
684	CALIFORNIA	10	1378.92	2002	14
685	CALIFORNIA	10	1361.85	2002	14
686	CALIFORNIA	10	1378.92	2002	14
687	CALIFORNIA	10	1190.55	2002	14
688	CALIFORNIA	10	1380.44	2002	14
689	CALIFORNIA	10	1387.14	2002	14
690	CALIFORNIA	10	1192.38	2003	13
691	CALIFORNIA	10	1169.52	2003	13
692	CALIFORNIA	10	1554.18	2004	12
693	CALIFORNIA	10	1556.92	2004	12
694	CALIFORNIA	10	1499.62	2004	12
695	CALIFORNIA	10	1499.01	2004	12
696	CALIFORNIA	10	1525.22	2005	11
697	CALIFORNIA	10	1459.69	2005	11
698	CALIFORNIA	10	1578.56	2009	7
699	CALIFORNIA	10	1383.79	2009	7
700	CALIFORNIA	11	1272.54	1984	32
701	CALIFORNIA	11	1273.45	1984	32
702	CALIFORNIA	11	1595.63	2004	12
703	CALIFORNIA	11	1807.16	2007	9
704	CALIFORNIA	11	1603.86	2009	7
705	CALIFORNIA	11	1694.38	2009	7
706	CALIFORNIA	11	1616.35	2009	7
707	CALIFORNIA	11	1534.36	2009	7
708	CALIFORNIA	11	1532.84	2009	7
709	CALIFORNIA	11	1535.89	2010	6
710	CALIFORNIA	11	1524.61	2013	3
711	CALIFORNIA	11	1499.92	2013	3
712	CALIFORNIA	11	1630.68	2013	3
713	CALIFORNIA	11	1203.96	2015	1
714	CALIFORNIA	11	1467.31	2015	1
715	CALIFORNIA	12	1373.43	1981	35
716	CALIFORNIA	12	1090.27	1982	34
717	CALIFORNIA	12	1552.65	1983	33
718	CALIFORNIA	12	1614.22	1990	26
719	CALIFORNIA	12	1202.44	2003	13
720	CALIFORNIA	12	1446.28	2006	10
721	CALIFORNIA	12	1527.35	2009	7
722	CALIFORNIA	12	1607.21	2009	7
723	CALIFORNIA	12	1442.92	2009	7
724	CALIFORNIA	12	1428.29	2009	7
725	CALIFORNIA	12	1673.35	2009	7
726	CALIFORNIA	12	1673.05	2009	7
727	CALIFORNIA	12	1700.48	2009	7
728	CALIFORNIA	12	1637.39	2009	7
729	CALIFORNIA	12	1462.13	2009	7
730	CALIFORNIA	12	1486.51	2009	7
731	CALIFORNIA	12	1428.90	2009	7
732	CALIFORNIA	12	1499.62	2015	1
733	CALIFORNIA	13	1188.11	2005	11
734	CALIFORNIA	13	1611.78	2009	7
735	CALIFORNIA	13	1447.80	2009	7
736	CALIFORNIA	13	1593.80	2013	3
737	CALIFORNIA	14	1089.36	1982	34
738	CALIFORNIA	14	1548.38	1983	33
739	CALIFORNIA	14	1193.90	1992	24
740	CALIFORNIA	14	1427.99	2006	10
741	CALIFORNIA	14	1446.58	2009	7
742	CALIFORNIA	14	1630.38	2009	7
743	CALIFORNIA	14	1649.88	2009	7
744	CALIFORNIA	14	1726.69	2015	1
745	CALIFORNIA	15	1239.01	1982	34
746	CALIFORNIA	15	1417.62	1982	34
747	CALIFORNIA	15	1242.97	1982	34
748	CALIFORNIA	15	1423.11	1982	34
749	CALIFORNIA	15	1363.37	1984	32
750	CALIFORNIA	15	1507.85	1985	31
751	CALIFORNIA	15	1320.09	2002	14
752	CALIFORNIA	15	1193.60	2002	14
753	CALIFORNIA	15	1181.10	2005	11
754	CALIFORNIA	15	1806.24	2007	9
755	CALIFORNIA	16	1343.25	1984	32
756	CALIFORNIA	16	1362.15	1996	20
757	CALIFORNIA	16	1552.35	2001	15
758	CALIFORNIA	16	1124.10	2007	9
759	CALIFORNIA	16	1689.51	2009	7
760	CALIFORNIA	16	1518.82	2013	3
761	CALIFORNIA	17	1568.20	1981	35
762	CALIFORNIA	17	1692.55	2000	16
763	CALIFORNIA	17	1607.82	2000	16
764	CALIFORNIA	17	1506.32	2005	11
765	CALIFORNIA	17	1506.32	2006	10
766	CALIFORNIA	17	1425.85	2009	7
767	CALIFORNIA	17	1610.87	2009	7
768	CALIFORNIA	17	1504.80	2009	7
769	CALIFORNIA	17	1385.32	2009	7
770	CALIFORNIA	18	1467.31	2002	14
771	CALIFORNIA	18	1080.52	2005	11
772	CALIFORNIA	18	1080.52	2005	11
773	CALIFORNIA	18	1680.97	2015	1
774	CALIFORNIA	19	1467.00	1995	21
775	CALIFORNIA	19	1633.12	2000	16
776	CALIFORNIA	19	1162.51	2005	11
777	CALIFORNIA	19	1214.32	2007	9
778	CALIFORNIA	19	1617.57	2009	7
779	CALIFORNIA	19	1628.85	2013	3
780	CALIFORNIA	20	1570.63	1981	35
781	CALIFORNIA	20	1030.53	1981	35
782	CALIFORNIA	20	1398.12	1981	35
783	CALIFORNIA	20	1707.49	1981	35
784	CALIFORNIA	20	1462.74	1998	18
785	CALIFORNIA	20	1374.34	2002	14
786	CALIFORNIA	20	1557.22	2004	12
787	CALIFORNIA	20	1625.50	2009	7
788	CALIFORNIA	20	1511.20	2009	7
789	CALIFORNIA	20	1487.73	2009	7
790	CALIFORNIA	20	1474.01	2010	6
791	CALIFORNIA	20	1232.31	2012	4
792	CALIFORNIA	20	1233.53	2012	4
793	CALIFORNIA	20	1622.45	2015	1
794	CALIFORNIA	21	1151.53	1997	19
795	CALIFORNIA	21	1226.52	2015	1
796	CALIFORNIA	21	1605.99	2015	1
797	CALIFORNIA	22	1410.92	1990	26
798	CALIFORNIA	22	1083.87	2006	10
799	CALIFORNIA	22	1083.56	2006	10
800	CALIFORNIA	22	1323.14	2015	1
801	CALIFORNIA	22	1687.37	2015	1
802	CALIFORNIA	23	1188.72	1992	24
803	CALIFORNIA	23	1320.09	2002	14
804	CALIFORNIA	23	1250.59	2007	9
805	CALIFORNIA	23	1449.32	2009	7
806	CALIFORNIA	24	1557.22	1983	33
807	CALIFORNIA	24	1526.44	1988	28
808	CALIFORNIA	24	1535.89	1988	28
809	CALIFORNIA	24	1686.76	2009	7
810	CALIFORNIA	24	1243.89	2015	1
811	CALIFORNIA	25	1456.94	1988	28
812	CALIFORNIA	25	1441.70	1988	28
813	CALIFORNIA	25	1397.51	1996	20
814	CALIFORNIA	25	1235.96	1996	20
815	CALIFORNIA	25	1294.49	2002	14
816	CALIFORNIA	25	1294.49	2002	14
817	CALIFORNIA	25	1370.38	2002	14
818	CALIFORNIA	25	1449.93	2005	11
819	CALIFORNIA	25	1497.48	2006	10
820	CALIFORNIA	25	1497.48	2006	10
821	CALIFORNIA	25	1438.66	2009	7
822	CALIFORNIA	25	1401.78	2009	7
823	CALIFORNIA	25	1564.23	2015	1
824	CALIFORNIA	26	716.89	1988	28
825	CALIFORNIA	26	1513.94	2013	3
826	CALIFORNIA	26	1585.87	2015	1
827	CALIFORNIA	26	1614.53	2015	1
828	CALIFORNIA	26	1187.50	2015	1
829	CALIFORNIA	27	1688.59	1990	26
830	CALIFORNIA	27	1540.46	2009	7
831	CALIFORNIA	27	1427.07	2009	7
832	CALIFORNIA	27	1661.16	2009	7
833	CALIFORNIA	27	1657.50	2009	7
834	CALIFORNIA	27	1519.73	2009	7
835	CALIFORNIA	28	1414.88	1991	25
836	CALIFORNIA	28	1527.05	2009	7
837	CALIFORNIA	28	1542.90	2009	7
838	CALIFORNIA	28	1357.88	2015	1
839	CALIFORNIA	28	1286.26	2015	1
840	CALIFORNIA	29	1555.70	1983	33
841	CALIFORNIA	29	1528.27	2009	7
842	CALIFORNIA	29	1453.29	2009	7
843	CALIFORNIA	30	1331.67	1984	32
844	CALIFORNIA	30	1502.05	1984	32
845	CALIFORNIA	30	1330.45	1984	32
846	CALIFORNIA	30	1500.23	1984	32
847	CALIFORNIA	30	1460.30	1985	31
848	CALIFORNIA	30	1460.91	1985	31
849	CALIFORNIA	30	1665.43	1990	26
850	CALIFORNIA	30	1395.07	1996	20
851	CALIFORNIA	30	1554.78	2000	16
852	CALIFORNIA	30	1559.66	2000	16
853	CALIFORNIA	30	1367.94	2002	14
854	CALIFORNIA	30	1468.22	2009	7
855	CALIFORNIA	30	1668.17	2009	7
856	CALIFORNIA	30	1481.94	2015	1
857	CALIFORNIA	30	1633.42	2015	1
858	CALIFORNIA	31	1514.25	1992	24
859	CALIFORNIA	31	1539.85	1998	18
860	CALIFORNIA	31	1540.76	1998	18
861	CALIFORNIA	32	1613.00	2009	7
862	CALIFORNIA	32	1496.26	2015	1
863	CALIFORNIA	34	1428.90	2009	7
864	CALIFORNIA	34	1550.21	2009	7
865	CALIFORNIA	34	1529.79	2013	3
866	CALIFORNIA	35	1656.59	1992	24
867	CALIFORNIA	35	1656.28	1993	23
868	CALIFORNIA	35	1172.26	1996	20
869	CALIFORNIA	35	1506.02	2009	7
870	CALIFORNIA	35	1503.58	2011	5
871	CALIFORNIA	36	1551.13	1982	34
872	CALIFORNIA	36	1546.86	1983	33
873	CALIFORNIA	36	1510.28	2009	7
874	CALIFORNIA	36	1467.92	2009	7
875	CALIFORNIA	36	1285.04	2009	7
876	CALIFORNIA	37	1506.93	2009	7
877	CALIFORNIA	38	1393.85	2011	5
878	CALIFORNIA	38	1394.16	2011	5
879	CALIFORNIA	38	1582.52	2015	1
880	CALIFORNIA	40	1638.00	1989	27
881	CALIFORNIA	40	1723.64	2000	16
882	CALIFORNIA	40	1388.67	2002	14
883	CALIFORNIA	40	1388.67	2002	14
884	CALIFORNIA	40	1211.88	2015	1
885	CALIFORNIA	42	1477.98	2005	11
886	CALIFORNIA	42	1505.71	2009	7
887	CALIFORNIA	42	1511.20	2009	7
888	CALIFORNIA	42	1652.32	2012	4
889	CALIFORNIA	42	1518.51	2015	1
890	CALIFORNIA	43	1037.23	1981	35
891	CALIFORNIA	43	1475.84	2009	7
892	CALIFORNIA	44	1240.23	2015	1
893	CALIFORNIA	44	1477.67	2015	1
894	CALIFORNIA	45	1407.87	1985	31
895	CALIFORNIA	45	1325.88	1996	20
896	CALIFORNIA	45	1552.04	2009	7
897	CALIFORNIA	45	1555.09	2009	7
898	CALIFORNIA	46	1476.45	2013	3
899	CALIFORNIA	46	1480.11	2015	1
900	CALIFORNIA	47	1531.62	1984	32
901	CALIFORNIA	47	1799.54	2007	9
902	CALIFORNIA	47	1488.03	2009	7
903	CALIFORNIA	48	1478.89	2005	11
904	CALIFORNIA	48	1551.13	2009	7
905	CALIFORNIA	48	1620.01	2015	1
906	CALIFORNIA	50	1657.81	1989	27
907	CALIFORNIA	50	1685.54	1990	26
908	CALIFORNIA	50	1465.17	1996	20
909	CALIFORNIA	50	1389.89	1996	20
910	CALIFORNIA	50	1397.81	1996	20
911	CALIFORNIA	50	1646.22	1996	20
912	CALIFORNIA	50	1214.02	1996	20
913	CALIFORNIA	50	1454.81	1996	20
914	CALIFORNIA	50	1596.54	1997	19
915	CALIFORNIA	50	1593.49	1997	19
916	CALIFORNIA	50	1640.74	2002	14
917	CALIFORNIA	50	1249.68	2005	11
918	CALIFORNIA	50	1137.51	2005	11
919	CALIFORNIA	50	1150.92	2005	11
920	CALIFORNIA	50	1246.63	2005	11
921	CALIFORNIA	50	1322.83	2015	1
922	CALIFORNIA	51	1489.25	2009	7
923	CALIFORNIA	52	1449.32	2002	14
924	CALIFORNIA	52	1688.59	2006	10
925	CALIFORNIA	53	1438.35	2009	7
926	CALIFORNIA	53	1310.94	2015	1
927	CALIFORNIA	53	1684.63	2015	1
928	CALIFORNIA	55	1694.08	2009	7
929	CALIFORNIA	59	1587.40	1984	32
930	CALIFORNIA	59	1661.16	2012	4
931	CALIFORNIA	60	1199.39	1994	22
932	CALIFORNIA	60	1174.09	1994	22
933	CALIFORNIA	60	1688.59	1998	18
934	CALIFORNIA	60	1621.54	2009	7
935	CALIFORNIA	60	1624.58	2009	7
936	CALIFORNIA	60	1486.81	2015	1
937	CALIFORNIA	65	1673.96	2009	7
938	CALIFORNIA	65	1670.61	2009	7
939	CALIFORNIA	68	1588.31	2004	12
940	CALIFORNIA	68	1569.72	2004	12
941	CALIFORNIA	68	1560.27	2004	12
942	CALIFORNIA	72	1678.23	2009	7
943	CALIFORNIA	73	1404.82	2006	10
944	CALIFORNIA	73	1557.22	2009	7
945	CALIFORNIA	75	1634.34	1989	27
946	CALIFORNIA	75	1289.30	1991	25
947	CALIFORNIA	75	1684.93	2000	16
948	CALIFORNIA	76	1483.16	2015	1
949	CALIFORNIA	77	1596.24	2009	7
950	CALIFORNIA	77	1463.65	2011	5
951	CALIFORNIA	77	1472.49	2011	5
952	CALIFORNIA	79	1418.54	2009	7
953	CALIFORNIA	80	1463.04	1996	20
954	CALIFORNIA	80	1600.20	2009	7
955	CALIFORNIA	80	1715.11	2009	7
956	CALIFORNIA	81	1514.55	2005	11
957	CALIFORNIA	83	1608.43	2009	7
958	CALIFORNIA	84	1453.29	2009	7
959	CALIFORNIA	85	1322.53	1990	26
960	CALIFORNIA	85	1434.39	2009	7
961	CALIFORNIA	86	1675.49	2009	7
962	CALIFORNIA	89	1516.08	1984	32
963	CALIFORNIA	89	1497.18	2006	10
964	CALIFORNIA	89	1055.22	2008	8
965	CALIFORNIA	89	1057.05	2008	8
966	CALIFORNIA	90	1464.87	1996	20
967	CALIFORNIA	90	1446.28	1996	20
968	CALIFORNIA	90	1434.69	2009	7
969	CALIFORNIA	91	1680.06	2015	1
970	CALIFORNIA	93	1501.44	2009	7
971	CALIFORNIA	98	1612.39	1993	23
972	CALIFORNIA	98	1435.00	2015	1
973	CALIFORNIA	100	1648.97	1989	27
974	CALIFORNIA	100	1519.43	1990	26
975	CALIFORNIA	100	1515.16	1990	26
976	CALIFORNIA	100	1411.53	1996	20
977	CALIFORNIA	100	1679.45	2000	16
978	CALIFORNIA	100	1607.82	2000	16
979	CALIFORNIA	100	1635.56	2002	14
980	CALIFORNIA	100	1684.32	2002	14
981	CALIFORNIA	100	1430.12	2006	10
982	CALIFORNIA	100	1510.89	2009	7
983	CALIFORNIA	104	1558.75	2012	4
984	CALIFORNIA	104	1522.78	2015	1
985	CALIFORNIA	107	1323.14	2007	9
986	CALIFORNIA	107	1522.78	2009	7
987	CALIFORNIA	110	1714.20	2015	1
988	CALIFORNIA	114	1665.12	2015	1
989	CALIFORNIA	115	1442.92	2005	11
990	CALIFORNIA	125	1614.22	1990	26
991	CALIFORNIA	125	1683.41	2009	7
992	CALIFORNIA	125	1487.42	2013	3
993	CALIFORNIA	130	1615.14	1996	20
994	CALIFORNIA	130	1616.96	1996	20
995	CALIFORNIA	132	1065.28	2012	4
996	CALIFORNIA	133	1439.88	2009	7
997	CALIFORNIA	135	1643.79	2012	4
998	CALIFORNIA	136	1468.83	2011	5
999	CALIFORNIA	136	1477.98	2011	5
1000	CALIFORNIA	138	1728.52	2009	7
1001	CALIFORNIA	151	1564.23	2009	7
1002	CALIFORNIA	158	1482.24	2006	10
1003	CALIFORNIA	160	1376.17	1998	18
1004	CALIFORNIA	175	1490.78	1996	20
1005	CALIFORNIA	175	1679.45	2002	14
1006	CALIFORNIA	182	1634.95	2015	1
1007	CALIFORNIA	190	1439.27	2011	5
1008	CALIFORNIA	190	1438.66	2011	5
1009	CALIFORNIA	192	1617.57	2015	1
1010	CALIFORNIA	200	1652.02	1981	35
1011	CALIFORNIA	200	1627.63	2000	16
1012	CALIFORNIA	200	1636.17	2000	16
1013	CALIFORNIA	200	1684.02	2000	16
1014	CALIFORNIA	200	1562.71	2001	15
1015	CALIFORNIA	200	1555.70	2002	14
1016	CALIFORNIA	200	1688.29	2009	7
1017	CALIFORNIA	216	1435.30	2009	7
1018	CALIFORNIA	226	1543.81	1984	32
1019	CALIFORNIA	232	1504.19	2009	7
1020	CALIFORNIA	250	1427.07	1996	20
1021	CALIFORNIA	250	1438.05	2006	10
1022	CALIFORNIA	250	1595.32	2013	3
1023	CALIFORNIA	252	1406.04	1984	32
1024	CALIFORNIA	300	1635.86	2002	14
1025	CALIFORNIA	300	1419.45	2006	10
1026	CALIFORNIA	300	1645.62	2007	9
1027	CALIFORNIA	300	1638.30	2007	9
1028	CALIFORNIA	320	1429.51	2006	10
1029	CALIFORNIA	345	1414.58	2006	10
1030	CALIFORNIA	348	1521.56	2009	7
1031	CALIFORNIA	370	1562.71	2009	7
1032	CALIFORNIA	399	1610.26	2015	1
1033	CALIFORNIA	500	1486.81	2006	10
1034	CALIFORNIA	500	1692.25	2009	7
1035	CALIFORNIA	500	1612.39	2015	1
1036	CALIFORNIA	594	1519.43	1989	27
1037	CALIFORNIA	600	1528.57	2001	15
1038	CALIFORNIA	800	1475.84	2005	11
1039	CALIFORNIA	999	1205.18	2003	13
1040	CALIFORNIA	1084	1519.43	1989	27
1041	CALIFORNIA	1500	1475.84	2006	10
1042	CALIFORNIA	1665	1680.06	2009	7
1043	CALIFORNIA	1859	1656.89	2006	10
1044	CALIFORNIA	1	1645.62	1987	29
1045	CALIFORNIA	1	1058.88	1988	28
1046	CALIFORNIA	1	530.05	2006	10
1047	CALIFORNIA	1	996.70	2008	8
1048	CALIFORNIA	2	866.24	2001	15
1049	CALIFORNIA	2	706.22	2006	10
1050	CALIFORNIA	3	977.80	2006	10
1051	CALIFORNIA	4	977.80	2007	9
1052	CALIFORNIA	5	804.37	1981	35
1053	CALIFORNIA	6	1160.07	1985	31
1054	CALIFORNIA	6	862.89	2004	12
1055	CALIFORNIA	8	765.66	2013	3
1056	CALIFORNIA	9	986.64	2009	7
1057	CALIFORNIA	13	986.94	1994	22
1058	CALIFORNIA	38	1796.80	2011	5
1059	CALIFORNIA	2	1690.12	1989	27
1060	CALIFORNIA	4	1108.86	1996	20
1061	CALIFORNIA	7	1024.13	1991	25
1062	CALIFORNIA	13	940.31	1996	20
1063	CALIFORNIA	16	917.45	1996	20
1064	CALIFORNIA	1	1108.25	1981	35
1065	CALIFORNIA	1	1098.50	1981	35
1066	CALIFORNIA	1	949.45	1998	18
1067	CALIFORNIA	1	954.02	2010	6
1068	CALIFORNIA	2	1127.76	1981	35
1069	CALIFORNIA	2	1075.64	1983	33
1070	CALIFORNIA	2	995.48	1999	17
1071	CALIFORNIA	2	907.08	2002	14
1072	CALIFORNIA	2	1018.34	2003	13
1073	CALIFORNIA	3	1042.42	2009	7
1074	CALIFORNIA	3	900.07	2012	4
1075	CALIFORNIA	4	820.83	1994	22
1076	CALIFORNIA	4	1248.46	1999	17
1077	CALIFORNIA	4	916.53	2003	13
1078	CALIFORNIA	5	1605.38	1981	35
1079	CALIFORNIA	5	884.22	2001	15
1080	CALIFORNIA	5	658.67	2003	13
1081	CALIFORNIA	5	888.49	2005	11
1082	CALIFORNIA	6	957.99	2009	7
1083	CALIFORNIA	6	1006.45	2013	3
1084	CALIFORNIA	6	850.39	2013	3
1085	CALIFORNIA	8	1665.43	1997	19
1086	CALIFORNIA	9	794.61	2003	13
1087	CALIFORNIA	10	657.76	2002	14
1088	CALIFORNIA	12	1060.40	1903	113
1089	CALIFORNIA	12	1097.58	1983	33
1090	CALIFORNIA	12	1059.18	1994	22
1091	CALIFORNIA	12	1261.57	2011	5
1092	CALIFORNIA	13	974.14	2009	7
1093	CALIFORNIA	15	915.92	2000	16
1094	CALIFORNIA	15	786.38	2007	9
1095	CALIFORNIA	20	1518.51	1981	35
1096	CALIFORNIA	22	1553.87	1981	35
1097	CALIFORNIA	22	923.85	2001	15
1098	CALIFORNIA	22	942.14	2001	15
1099	CALIFORNIA	27	1533.75	1981	35
1100	CALIFORNIA	27	1555.09	1981	35
1101	CALIFORNIA	29	1570.94	1981	35
1102	CALIFORNIA	36	1477.98	1981	35
1103	CALIFORNIA	36	1416.41	1981	35
1104	CALIFORNIA	50	974.75	1981	35
1105	CALIFORNIA	50	951.28	1981	35
1106	CALIFORNIA	50	1134.16	1999	17
1107	CALIFORNIA	50	859.54	2012	4
1108	CALIFORNIA	55	859.54	2010	6
1109	CALIFORNIA	64	1089.05	2009	7
1110	CALIFORNIA	83	945.49	2005	11
1111	CALIFORNIA	1	771.75	2010	6
1112	CALIFORNIA	1	771.45	2010	6
1113	CALIFORNIA	2	898.86	2001	15
1114	CALIFORNIA	2	898.86	2001	15
1115	CALIFORNIA	3	783.95	2010	6
1116	CALIFORNIA	4	784.56	1996	20
1117	CALIFORNIA	4	797.05	2002	14
1118	CALIFORNIA	5	477.32	2013	3
1119	CALIFORNIA	5	898.86	2013	3
1120	CALIFORNIA	6	1388.67	2010	6
1121	CALIFORNIA	9	965.30	2010	6
1122	CALIFORNIA	9	968.65	2010	6
1123	CALIFORNIA	13	1324.36	2002	14
1124	CALIFORNIA	19	1148.49	2002	14
1125	CALIFORNIA	19	1241.45	2002	14
1126	CALIFORNIA	26	512.37	2002	14
1127	CALIFORNIA	26	499.26	2002	14
1128	CALIFORNIA	29	956.46	2002	14
1129	CALIFORNIA	47	768.40	2010	6
1130	CALIFORNIA	69	984.50	1997	19
1131	CALIFORNIA	69	973.84	1997	19
1132	CALIFORNIA	71	1353.92	2010	6
1133	CALIFORNIA	71	1350.26	2010	6
1134	CALIFORNIA	85	770.53	1998	18
1135	CALIFORNIA	100	1434.39	1998	18
1136	CALIFORNIA	100	768.40	2015	1
1137	CALIFORNIA	138	1431.65	2010	6
1138	CALIFORNIA	138	1427.99	2010	6
1139	CALIFORNIA	219	768.40	2002	14
1140	CALIFORNIA	506	1432.56	2002	14
1141	CALIFORNIA	1	606.55	2002	14
1142	CALIFORNIA	2	1038.15	2015	1
1143	CALIFORNIA	3	1097.58	2002	14
1144	CALIFORNIA	4	1123.80	1989	27
1145	CALIFORNIA	4	1111.30	1989	27
1146	CALIFORNIA	4	1105.20	2014	2
1147	CALIFORNIA	5	1038.45	1981	35
1148	CALIFORNIA	7	1065.58	1993	23
1149	CALIFORNIA	8	1108.86	1993	23
1150	CALIFORNIA	11	1146.05	2015	1
1151	CALIFORNIA	14	1215.54	1992	24
1152	CALIFORNIA	29	1099.41	2013	3
1153	CALIFORNIA	50	1521.87	2011	5
1154	CALIFORNIA	70	1554.18	2010	6
1155	CALIFORNIA	154	1055.52	1985	31
1156	CALIFORNIA	320	1662.68	2003	13
1157	CALIFORNIA	3	1395.68	1998	18
1158	OREGON	1	1149.40	1928	88
1159	OREGON	1	890.63	1979	37
1160	OREGON	1	857.10	1979	37
1161	OREGON	1	967.13	1979	37
1162	OREGON	1	1041.50	1981	35
1163	OREGON	1	686.10	1981	35
1164	OREGON	1	1334.72	1981	35
1165	OREGON	1	764.44	1981	35
1166	OREGON	1	731.82	1981	35
1167	OREGON	1	764.74	1981	35
1168	OREGON	1	725.12	1981	35
1169	OREGON	1	807.11	1981	35
1170	OREGON	1	906.48	1981	35
1171	OREGON	1	755.60	1981	35
1172	OREGON	1	1141.48	1981	35
1173	OREGON	1	879.96	1981	35
1174	OREGON	1	774.19	1981	35
1175	OREGON	1	681.23	1981	35
1176	OREGON	1	764.44	1981	35
1177	OREGON	1	767.79	1981	35
1178	OREGON	1	1095.45	1983	33
1179	OREGON	1	612.34	1983	33
1180	OREGON	1	1045.77	1985	31
1181	OREGON	1	1120.14	1985	31
1182	OREGON	1	1025.96	1985	31
1183	OREGON	1	968.65	1985	31
1184	OREGON	1	972.62	1985	31
1185	OREGON	1	1287.78	1985	31
1186	OREGON	1	1047.90	1985	31
1187	OREGON	1	458.11	1989	27
1188	OREGON	1	979.02	1991	25
1189	OREGON	1	979.02	1991	25
1190	OREGON	1	951.59	1991	25
1191	OREGON	1	658.06	1991	25
1192	OREGON	1	608.99	1991	25
1193	OREGON	1	657.45	1991	25
1194	OREGON	1	574.85	1991	25
1195	OREGON	1	766.27	1991	25
1196	OREGON	1	592.23	1991	25
1197	OREGON	1	555.65	1991	25
1198	OREGON	1	893.67	1991	25
1199	OREGON	1	551.08	1991	25
1200	OREGON	1	987.25	1991	25
1201	OREGON	1	1009.80	1991	25
1202	OREGON	1	628.80	1992	24
1203	OREGON	1	881.18	1992	24
1204	OREGON	1	762.30	1992	24
1205	OREGON	1	690.98	1992	24
1206	OREGON	1	633.68	1992	24
1207	OREGON	1	853.44	1992	24
1208	OREGON	1	587.04	1992	24
1209	OREGON	1	480.06	1993	23
1210	OREGON	1	616.92	1994	22
1211	OREGON	1	796.75	1994	22
1212	OREGON	1	731.22	1994	22
1213	OREGON	1	778.15	1995	21
1214	OREGON	1	873.56	1995	21
1215	OREGON	1	839.11	1995	21
1216	OREGON	1	970.18	1995	21
1217	OREGON	1	620.88	1995	21
1218	OREGON	1	960.42	1995	21
1219	OREGON	1	835.46	1995	21
1220	OREGON	1	681.84	1995	21
1221	OREGON	1	737.01	1995	21
1222	OREGON	1	972.92	1995	21
1223	OREGON	1	953.41	1995	21
1224	OREGON	1	697.99	1995	21
1225	OREGON	1	692.51	1995	21
1226	OREGON	1	638.86	1995	21
1227	OREGON	1	491.64	1995	21
1228	OREGON	1	731.52	1995	21
1229	OREGON	1	862.28	1995	21
1230	OREGON	1	960.42	1995	21
1231	OREGON	1	680.62	1995	21
1232	OREGON	1	960.12	1995	21
1233	OREGON	1	955.55	1995	21
1234	OREGON	1	601.68	1995	21
1235	OREGON	1	371.25	1996	20
1236	OREGON	1	1260.65	1996	20
1237	OREGON	1	542.54	1996	20
1238	OREGON	1	411.78	1996	20
1239	OREGON	1	722.99	1996	20
1240	OREGON	1	608.99	1996	20
1241	OREGON	1	445.62	1996	20
1242	OREGON	1	639.47	1996	20
1243	OREGON	1	1372.21	1996	20
1244	OREGON	1	499.87	1996	20
1245	OREGON	1	517.25	1996	20
1246	OREGON	1	596.49	1997	19
1247	OREGON	1	620.88	1997	19
1248	OREGON	1	469.09	1997	19
1249	OREGON	1	863.19	1997	19
1250	OREGON	1	445.01	1997	19
1251	OREGON	1	445.01	1997	19
1252	OREGON	1	571.50	1997	19
1253	OREGON	1	671.47	1997	19
1254	OREGON	1	598.93	1997	19
1255	OREGON	1	660.50	1998	18
1256	OREGON	1	949.15	1998	18
1257	OREGON	1	838.20	1998	18
1258	OREGON	1	778.15	1998	18
1259	OREGON	1	1254.86	1998	18
1260	OREGON	1	875.39	1998	18
1261	OREGON	1	836.98	1998	18
1262	OREGON	1	964.69	1998	18
1263	OREGON	1	788.52	1998	18
1264	OREGON	1	1185.67	1998	18
1265	OREGON	1	929.94	1998	18
1266	OREGON	1	778.15	1998	18
1267	OREGON	1	1263.09	1998	18
1268	OREGON	1	665.07	1998	18
1269	OREGON	1	865.94	1998	18
1270	OREGON	1	391.36	1998	18
1271	OREGON	1	1333.80	1998	18
1272	OREGON	1	1098.50	1998	18
1273	OREGON	1	771.14	1998	18
1274	OREGON	1	851.61	1998	18
1275	OREGON	1	834.24	1998	18
1276	OREGON	1	732.74	1998	18
1277	OREGON	1	758.04	1998	18
1278	OREGON	1	618.74	1998	18
1279	OREGON	1	888.19	1999	17
1280	OREGON	1	466.95	1999	17
1281	OREGON	1	616.92	1999	17
1282	OREGON	1	863.19	1999	17
1283	OREGON	1	644.04	1999	17
1284	OREGON	1	590.70	1999	17
1285	OREGON	1	490.42	1999	17
1286	OREGON	1	958.29	1999	17
1287	OREGON	1	628.19	2000	16
1288	OREGON	1	511.45	2000	16
1289	OREGON	1	1001.27	2000	16
1290	OREGON	1	613.26	2000	16
1291	OREGON	1	821.13	2000	16
1292	OREGON	1	908.61	2000	16
1293	OREGON	1	859.23	2000	16
1294	OREGON	1	947.32	2000	16
1295	OREGON	1	771.45	2000	16
1296	OREGON	1	731.52	2000	16
1297	OREGON	1	810.46	2000	16
1298	OREGON	1	637.95	2000	16
1299	OREGON	1	693.12	2001	15
1300	OREGON	1	792.78	2001	15
1301	OREGON	1	770.84	2001	15
1302	OREGON	1	790.35	2002	14
1303	OREGON	1	589.79	2002	14
1304	OREGON	1	751.94	2003	13
1305	OREGON	1	571.80	2003	13
1306	OREGON	1	626.36	2003	13
1307	OREGON	1	651.36	2003	13
1308	OREGON	1	656.23	2003	13
1309	OREGON	1	714.15	2003	13
1310	OREGON	1	646.18	2003	13
1311	OREGON	1	488.29	2003	13
1312	OREGON	1	500.48	2003	13
1313	OREGON	1	975.66	2004	12
1314	OREGON	1	1244.19	2004	12
1315	OREGON	1	806.50	2004	12
1316	OREGON	1	783.03	2004	12
1317	OREGON	1	911.35	2004	12
1318	OREGON	1	1191.77	2004	12
1319	OREGON	1	1222.55	2004	12
1320	OREGON	1	1301.80	2004	12
1321	OREGON	1	1281.07	2004	12
1322	OREGON	1	622.71	2004	12
1323	OREGON	1	1035.10	2004	12
1324	OREGON	1	1084.78	2004	12
1325	OREGON	1	921.11	2004	12
1326	OREGON	1	1032.36	2004	12
1327	OREGON	1	457.50	2004	12
1328	OREGON	1	1102.16	2004	12
1329	OREGON	1	791.57	2004	12
1330	OREGON	1	822.66	2004	12
1331	OREGON	1	1186.28	2004	12
1332	OREGON	1	766.57	2004	12
1333	OREGON	1	1296.31	2004	12
1334	OREGON	1	804.06	2004	12
1335	OREGON	1	822.66	2004	12
1336	OREGON	1	713.23	2004	12
1337	OREGON	1	1123.80	2004	12
1338	OREGON	1	1329.84	2004	12
1339	OREGON	1	1154.28	2004	12
1340	OREGON	1	853.14	2005	11
1341	OREGON	1	597.41	2005	11
1342	OREGON	1	806.50	2005	11
1343	OREGON	1	699.21	2005	11
1344	OREGON	1	528.22	2005	11
1345	OREGON	1	881.48	2005	11
1346	OREGON	1	387.40	2005	11
1347	OREGON	1	872.95	2005	11
1348	OREGON	1	785.77	2005	11
1349	OREGON	1	636.42	2005	11
1350	OREGON	1	601.37	2005	11
1351	OREGON	1	542.54	2005	11
1352	OREGON	1	848.56	2005	11
1353	OREGON	1	745.54	2006	10
1354	OREGON	1	787.60	2006	10
1355	OREGON	1	907.69	2006	10
1356	OREGON	1	817.17	2006	10
1357	OREGON	1	785.47	2006	10
1358	OREGON	1	345.34	2006	10
1359	OREGON	1	692.20	2006	10
1360	OREGON	1	435.86	2006	10
1361	OREGON	1	513.28	2006	10
1362	OREGON	1	548.34	2006	10
1363	OREGON	1	601.37	2006	10
1364	OREGON	1	1074.72	2006	10
1365	OREGON	1	922.32	2007	9
1366	OREGON	1	455.37	2007	9
1367	OREGON	1	872.95	2007	9
1368	OREGON	1	873.56	2007	9
1369	OREGON	1	832.41	2007	9
1370	OREGON	1	648.31	2007	9
1371	OREGON	1	447.14	2007	9
1372	OREGON	1	922.32	2007	9
1373	OREGON	1	379.17	2007	9
1374	OREGON	1	1121.36	2007	9
1375	OREGON	1	660.81	2008	8
1376	OREGON	1	637.95	2008	8
1377	OREGON	1	850.70	2008	8
1378	OREGON	1	636.73	2008	8
1379	OREGON	1	563.88	2008	8
1380	OREGON	1	850.70	2008	8
1381	OREGON	1	727.25	2008	8
1382	OREGON	1	839.72	2008	8
1383	OREGON	1	880.57	2008	8
1384	OREGON	1	647.70	2008	8
1385	OREGON	1	480.97	2008	8
1386	OREGON	1	1087.53	2008	8
1387	OREGON	1	792.48	2008	8
1388	OREGON	1	697.99	2008	8
1389	OREGON	1	744.93	2008	8
1390	OREGON	1	756.82	2008	8
1391	OREGON	1	998.22	2008	8
1392	OREGON	1	784.25	2008	8
1393	OREGON	1	928.12	2008	8
1394	OREGON	1	775.72	2008	8
1395	OREGON	1	1415.80	2008	8
1396	OREGON	1	1357.58	2008	8
1397	OREGON	1	855.88	2008	8
1398	OREGON	1	794.61	2008	8
1399	OREGON	1	1087.22	2008	8
1400	OREGON	1	819.00	2008	8
1401	OREGON	1	414.83	2008	8
1402	OREGON	1	438.00	2008	8
1403	OREGON	1	758.95	2008	8
1404	OREGON	1	667.82	2009	7
1405	OREGON	1	937.26	2009	7
1406	OREGON	1	414.53	2009	7
1407	OREGON	1	513.59	2009	7
1408	OREGON	1	663.24	2009	7
1409	OREGON	1	336.50	2009	7
1410	OREGON	1	1169.52	2010	6
1411	OREGON	1	776.63	2010	6
1412	OREGON	1	821.13	2010	6
1413	OREGON	1	637.64	2010	6
1414	OREGON	1	536.14	2010	6
1415	OREGON	1	493.78	2010	6
1416	OREGON	1	614.48	2010	6
1417	OREGON	1	437.69	2010	6
1418	OREGON	1	1169.52	2010	6
1419	OREGON	1	702.56	2010	6
1420	OREGON	1	698.91	2010	6
1421	OREGON	1	605.33	2010	6
1422	OREGON	1	792.78	2010	6
1423	OREGON	1	509.02	2010	6
1424	OREGON	1	1011.02	2010	6
1425	OREGON	1	942.44	2010	6
1426	OREGON	1	1275.28	2010	6
1427	OREGON	1	694.64	2010	6
1428	OREGON	1	500.18	2010	6
1429	OREGON	1	912.57	2010	6
1430	OREGON	1	914.70	2011	5
1431	OREGON	1	701.04	2011	5
1432	OREGON	1	701.04	2011	5
1433	OREGON	1	852.22	2011	5
1434	OREGON	1	525.78	2012	4
1435	OREGON	1	573.94	2012	4
1436	OREGON	1	614.48	2012	4
1437	OREGON	1	573.94	2012	4
1438	OREGON	1	666.29	2012	4
1439	OREGON	1	805.89	2012	4
1440	OREGON	1	608.99	2013	3
1441	OREGON	1	940.92	2013	3
1442	OREGON	1	828.75	2013	3
1443	OREGON	1	646.79	2014	2
1444	OREGON	1	646.18	2014	2
1445	OREGON	1	912.27	2015	1
1446	OREGON	1	616.00	2015	1
1447	OREGON	1	616.00	2015	1
1448	OREGON	1	1002.49	2015	1
1449	OREGON	1	883.31	2015	1
1450	OREGON	1	616.00	2015	1
1451	OREGON	1	969.26	2016	0
1452	OREGON	1	658.98	2016	0
1453	OREGON	1	976.27	2016	0
1454	OREGON	1	969.26	2016	0
1455	OREGON	2	1129.59	1985	31
1456	OREGON	2	1010.72	1985	31
1457	OREGON	2	567.23	1991	25
1458	OREGON	2	723.90	1991	25
1459	OREGON	2	672.39	1991	25
1460	OREGON	2	670.86	1991	25
1461	OREGON	2	618.74	1994	22
1462	OREGON	2	769.62	1995	21
1463	OREGON	2	840.64	1995	21
1464	OREGON	2	808.63	1995	21
1465	OREGON	2	828.45	1995	21
1466	OREGON	2	524.56	1995	21
1467	OREGON	2	938.48	1995	21
1468	OREGON	2	991.51	1995	21
1469	OREGON	2	639.47	1995	21
1470	OREGON	2	687.63	1995	21
1471	OREGON	2	777.54	1995	21
1472	OREGON	2	739.14	1995	21
1473	OREGON	2	663.85	1995	21
1474	OREGON	2	610.51	1995	21
1475	OREGON	2	473.96	1995	21
1476	OREGON	2	605.33	1995	21
1477	OREGON	2	914.10	1996	20
1478	OREGON	2	922.32	1996	20
1479	OREGON	2	511.45	1996	20
1480	OREGON	2	526.39	1996	20
1481	OREGON	2	430.99	1996	20
1482	OREGON	2	351.43	1996	20
1483	OREGON	2	470.61	1996	20
1484	OREGON	2	480.67	1996	20
1485	OREGON	2	824.48	1997	19
1486	OREGON	2	778.76	1997	19
1487	OREGON	2	638.86	1997	19
1488	OREGON	2	747.06	1997	19
1489	OREGON	2	638.86	1997	19
1490	OREGON	2	1020.78	1998	18
1491	OREGON	2	588.87	1998	18
1492	OREGON	2	607.47	1998	18
1493	OREGON	2	421.84	1998	18
1494	OREGON	2	484.63	1998	18
1495	OREGON	2	816.25	1998	18
1496	OREGON	2	557.78	1998	18
1497	OREGON	2	1035.10	1998	18
1498	OREGON	2	857.10	1998	18
1499	OREGON	2	1035.41	1998	18
1500	OREGON	2	742.49	1998	18
1501	OREGON	2	888.80	1999	17
1502	OREGON	2	541.32	1999	17
1503	OREGON	2	531.57	1999	17
1504	OREGON	2	590.70	1999	17
1505	OREGON	2	346.25	1999	17
1506	OREGON	2	549.55	1999	17
1507	OREGON	2	586.13	1999	17
1508	OREGON	2	651.05	1999	17
1509	OREGON	2	829.97	2000	16
1510	OREGON	2	752.86	2000	16
1511	OREGON	2	512.67	2000	16
1512	OREGON	2	610.51	2000	16
1513	OREGON	2	857.40	2000	16
1514	OREGON	2	647.09	2000	16
1515	OREGON	2	1047.90	2000	16
1516	OREGON	2	1282.90	2000	16
1517	OREGON	2	679.09	2001	15
1518	OREGON	2	1048.21	2001	15
1519	OREGON	2	604.72	2002	14
1520	OREGON	2	650.44	2003	13
1521	OREGON	2	730.91	2003	13
1522	OREGON	2	629.41	2003	13
1523	OREGON	2	658.37	2003	13
1524	OREGON	2	629.41	2003	13
1525	OREGON	2	573.94	2003	13
1526	OREGON	2	629.41	2003	13
1527	OREGON	2	559.00	2003	13
1528	OREGON	2	714.15	2003	13
1529	OREGON	2	768.40	2004	12
1530	OREGON	2	839.72	2004	12
1531	OREGON	2	1137.21	2004	12
1532	OREGON	2	646.18	2004	12
1533	OREGON	2	800.40	2004	12
1534	OREGON	2	360.58	2004	12
1535	OREGON	2	854.35	2004	12
1536	OREGON	2	656.84	2005	11
1537	OREGON	2	820.22	2005	11
1538	OREGON	2	577.90	2005	11
1539	OREGON	2	493.17	2005	11
1540	OREGON	2	695.25	2005	11
1541	OREGON	2	856.49	2005	11
1542	OREGON	2	928.73	2006	10
1543	OREGON	2	656.84	2006	10
1544	OREGON	2	832.41	2006	10
1545	OREGON	2	356.01	2006	10
1546	OREGON	2	615.70	2006	10
1547	OREGON	2	731.82	2006	10
1548	OREGON	2	729.39	2006	10
1549	OREGON	2	929.94	2006	10
1550	OREGON	2	919.28	2006	10
1551	OREGON	2	832.10	2007	9
1552	OREGON	2	1211.88	2007	9
1553	OREGON	2	532.49	2007	9
1554	OREGON	2	712.62	2007	9
1555	OREGON	2	614.48	2007	9
1556	OREGON	2	635.51	2008	8
1557	OREGON	2	459.94	2008	8
1558	OREGON	2	880.57	2008	8
1559	OREGON	2	673.30	2008	8
1560	OREGON	2	1152.45	2008	8
1561	OREGON	2	1152.45	2008	8
1562	OREGON	2	646.79	2008	8
1563	OREGON	2	729.08	2008	8
1564	OREGON	2	685.50	2008	8
1565	OREGON	2	729.08	2008	8
1566	OREGON	2	705.31	2008	8
1567	OREGON	2	751.03	2008	8
1568	OREGON	2	548.64	2008	8
1569	OREGON	2	1253.03	2008	8
1570	OREGON	2	1270.41	2008	8
1571	OREGON	2	715.06	2008	8
1572	OREGON	2	686.41	2008	8
1573	OREGON	2	623.62	2008	8
1574	OREGON	2	469.09	2008	8
1575	OREGON	2	686.71	2009	7
1576	OREGON	2	499.57	2009	7
1577	OREGON	2	520.90	2009	7
1578	OREGON	2	601.07	2009	7
1579	OREGON	2	806.81	2009	7
1580	OREGON	2	1012.85	2010	6
1581	OREGON	2	885.75	2010	6
1582	OREGON	2	1012.85	2010	6
1583	OREGON	2	1012.85	2010	6
1584	OREGON	2	615.39	2010	6
1585	OREGON	2	833.32	2010	6
1586	OREGON	2	893.06	2010	6
1587	OREGON	2	728.78	2010	6
1588	OREGON	2	702.56	2010	6
1589	OREGON	2	625.14	2010	6
1590	OREGON	2	776.63	2010	6
1591	OREGON	2	948.23	2011	5
1592	OREGON	2	820.52	2011	5
1593	OREGON	2	728.47	2011	5
1594	OREGON	2	1301.80	2011	5
1595	OREGON	2	1009.50	2012	4
1596	OREGON	2	840.64	2012	4
1597	OREGON	2	1150.01	2013	3
1598	OREGON	2	730.91	2013	3
1599	OREGON	2	689.15	2013	3
1600	OREGON	2	1157.94	2013	3
1601	OREGON	2	675.44	2013	3
1602	OREGON	2	1006.45	2015	1
1603	OREGON	2	616.92	2016	0
1604	OREGON	2	1012.24	2016	0
1605	OREGON	2	1090.88	2016	0
1606	OREGON	2	1146.35	2016	0
1607	OREGON	3	767.49	1984	32
1608	OREGON	3	1140.87	1985	31
1609	OREGON	3	636.42	1991	25
1610	OREGON	3	624.54	1991	25
1611	OREGON	3	460.25	1992	24
1612	OREGON	3	783.34	1992	24
1613	OREGON	3	569.06	1992	24
1614	OREGON	3	490.42	1993	23
1615	OREGON	3	648.00	1995	21
1616	OREGON	3	597.41	1995	21
1617	OREGON	3	787.60	1995	21
1618	OREGON	3	640.69	1995	21
1619	OREGON	3	1013.16	1995	21
1620	OREGON	3	817.17	1995	21
1621	OREGON	3	527.61	1995	21
1622	OREGON	3	572.41	1995	21
1623	OREGON	3	422.45	1996	20
1624	OREGON	3	635.51	1996	20
1625	OREGON	3	820.83	1997	19
1626	OREGON	3	783.03	1997	19
1627	OREGON	3	680.62	1997	19
1628	OREGON	3	859.54	1997	19
1629	OREGON	3	783.03	1997	19
1630	OREGON	3	481.28	1998	18
1631	OREGON	3	775.11	1998	18
1632	OREGON	3	428.24	1998	18
1633	OREGON	3	782.12	1998	18
1634	OREGON	3	836.68	1998	18
1635	OREGON	3	866.85	1998	18
1636	OREGON	3	1241.15	1998	18
1637	OREGON	3	828.14	1998	18
1638	OREGON	3	825.70	1999	17
1639	OREGON	3	569.67	1999	17
1640	OREGON	3	769.32	2000	16
1641	OREGON	3	611.43	2000	16
1642	OREGON	3	757.12	2001	15
1643	OREGON	3	696.16	2003	13
1644	OREGON	3	729.08	2003	13
1645	OREGON	3	622.40	2003	13
1646	OREGON	3	959.51	2004	12
1647	OREGON	3	943.05	2004	12
1648	OREGON	3	1288.39	2004	12
1649	OREGON	3	1087.22	2004	12
1650	OREGON	3	1203.05	2004	12
1651	OREGON	3	713.23	2004	12
1652	OREGON	3	729.69	2005	11
1653	OREGON	3	582.78	2005	11
1654	OREGON	3	517.86	2005	11
1655	OREGON	3	650.44	2005	11
1656	OREGON	3	1050.34	2005	11
1657	OREGON	3	744.93	2006	10
1658	OREGON	3	333.15	2006	10
1659	OREGON	3	593.75	2006	10
1660	OREGON	3	423.98	2006	10
1661	OREGON	3	696.77	2006	10
1662	OREGON	3	622.10	2006	10
1663	OREGON	3	547.73	2006	10
1664	OREGON	3	829.67	2007	9
1665	OREGON	3	469.39	2007	9
1666	OREGON	3	464.21	2007	9
1667	OREGON	3	568.15	2008	8
1668	OREGON	3	399.59	2008	8
1669	OREGON	3	520.60	2008	8
1670	OREGON	3	734.87	2008	8
1671	OREGON	3	715.06	2008	8
1672	OREGON	3	469.09	2008	8
1673	OREGON	3	498.04	2008	8
1674	OREGON	3	1093.01	2008	8
1675	OREGON	3	371.25	2009	7
1676	OREGON	3	679.70	2009	7
1677	OREGON	3	937.26	2009	7
1678	OREGON	3	937.87	2010	6
1679	OREGON	3	914.10	2010	6
1680	OREGON	3	919.28	2010	6
1681	OREGON	3	728.47	2011	5
1682	OREGON	3	1009.50	2012	4
1683	OREGON	3	840.94	2012	4
1684	OREGON	3	1046.38	2013	3
1685	OREGON	3	550.47	2014	2
1686	OREGON	3	378.26	2016	0
1687	OREGON	3	378.26	2016	0
1688	OREGON	4	798.58	1983	33
1689	OREGON	4	775.11	1991	25
1690	OREGON	4	768.71	1995	21
1691	OREGON	4	543.46	1995	21
1692	OREGON	4	473.35	1996	20
1693	OREGON	4	905.56	1997	19
1694	OREGON	4	712.93	1997	19
1695	OREGON	4	506.27	1998	18
1696	OREGON	4	907.69	1998	18
1697	OREGON	4	1020.78	1998	18
1698	OREGON	4	779.37	1998	18
1699	OREGON	4	977.19	1998	18
1700	OREGON	4	588.87	1998	18
1701	OREGON	4	669.65	1998	18
1702	OREGON	4	890.02	1998	18
1703	OREGON	4	1047.90	1998	18
1704	OREGON	4	1165.25	1998	18
1705	OREGON	4	1349.65	1999	17
1706	OREGON	4	848.87	1999	17
1707	OREGON	4	756.21	2000	16
1708	OREGON	4	720.24	2000	16
1709	OREGON	4	775.11	2001	15
1710	OREGON	4	650.44	2003	13
1711	OREGON	4	768.40	2004	12
1712	OREGON	4	859.84	2004	12
1713	OREGON	4	1152.75	2004	12
1714	OREGON	4	1221.94	2004	12
1715	OREGON	4	738.23	2004	12
1716	OREGON	4	937.56	2004	12
1717	OREGON	4	1263.70	2004	12
1718	OREGON	4	532.18	2004	12
1719	OREGON	4	622.71	2004	12
1720	OREGON	4	586.13	2005	11
1721	OREGON	4	1036.93	2005	11
1722	OREGON	4	587.04	2005	11
1723	OREGON	4	463.91	2005	11
1724	OREGON	4	398.37	2006	10
1725	OREGON	4	398.37	2006	10
1726	OREGON	4	746.76	2006	10
1727	OREGON	4	629.72	2006	10
1728	OREGON	4	392.89	2006	10
1729	OREGON	4	665.38	2006	10
1730	OREGON	4	873.56	2007	9
1731	OREGON	4	353.57	2007	9
1732	OREGON	4	360.58	2007	9
1733	OREGON	4	470.92	2007	9
1734	OREGON	4	660.81	2008	8
1735	OREGON	4	554.43	2008	8
1736	OREGON	4	808.63	2008	8
1737	OREGON	4	475.49	2008	8
1738	OREGON	4	719.02	2008	8
1739	OREGON	4	372.77	2009	7
1740	OREGON	4	878.13	2009	7
1741	OREGON	4	472.74	2010	6
1742	OREGON	4	1035.41	2010	6
1743	OREGON	4	492.56	2010	6
1744	OREGON	4	472.74	2010	6
1745	OREGON	4	831.19	2010	6
1746	OREGON	4	820.52	2011	5
1747	OREGON	4	1249.98	2011	5
1748	OREGON	4	1082.34	2011	5
1749	OREGON	4	521.21	2013	3
1750	OREGON	4	976.88	2016	0
1751	OREGON	4	616.92	2016	0
1752	OREGON	5	875.08	1988	28
1753	OREGON	5	672.39	1988	28
1754	OREGON	5	704.70	1988	28
1755	OREGON	5	729.08	1989	27
1756	OREGON	5	754.08	1991	25
1757	OREGON	5	564.18	1991	25
1758	OREGON	5	1288.08	1992	24
1759	OREGON	5	723.60	1992	24
1760	OREGON	5	693.72	1992	24
1761	OREGON	5	583.39	1992	24
1762	OREGON	5	779.37	1994	22
1763	OREGON	5	724.81	1994	22
1764	OREGON	5	1094.84	1995	21
1765	OREGON	5	760.48	1995	21
1766	OREGON	5	733.96	1995	21
1767	OREGON	5	546.81	1995	21
1768	OREGON	5	553.21	1995	21
1769	OREGON	5	518.77	1995	21
1770	OREGON	5	572.11	1995	21
1771	OREGON	5	662.64	1996	20
1772	OREGON	5	396.85	1996	20
1773	OREGON	5	357.53	1996	20
1774	OREGON	5	571.20	1996	20
1775	OREGON	5	623.01	1997	19
1776	OREGON	5	753.16	1997	19
1777	OREGON	5	705.61	1997	19
1778	OREGON	5	1132.94	1998	18
1779	OREGON	5	891.24	1998	18
1780	OREGON	5	1132.94	1998	18
1781	OREGON	5	968.04	1998	18
1782	OREGON	5	882.40	1998	18
1783	OREGON	5	986.33	1998	18
1784	OREGON	5	638.86	1998	18
1785	OREGON	5	855.57	1999	17
1786	OREGON	5	609.90	1999	17
1787	OREGON	5	637.34	2000	16
1788	OREGON	5	970.48	2001	15
1789	OREGON	5	511.15	2001	15
1790	OREGON	5	383.74	2002	14
1791	OREGON	5	608.69	2002	14
1792	OREGON	5	780.59	2004	12
1793	OREGON	5	1002.49	2004	12
1794	OREGON	5	1076.86	2004	12
1795	OREGON	5	1422.50	2004	12
1796	OREGON	5	935.13	2004	12
1797	OREGON	5	1036.93	2005	11
1798	OREGON	5	702.56	2005	11
1799	OREGON	5	854.05	2005	11
1800	OREGON	5	979.63	2005	11
1801	OREGON	5	320.95	2006	10
1802	OREGON	5	691.90	2006	10
1803	OREGON	5	407.82	2006	10
1804	OREGON	5	807.42	2007	9
1805	OREGON	5	556.87	2007	9
1806	OREGON	5	625.14	2007	9
1807	OREGON	5	545.59	2007	9
1808	OREGON	5	929.94	2007	9
1809	OREGON	5	466.04	2008	8
1810	OREGON	5	510.54	2009	7
1811	OREGON	5	336.50	2009	7
1812	OREGON	5	1020.17	2010	6
1813	OREGON	5	1235.05	2013	3
1814	OREGON	5	714.45	2016	0
1815	OREGON	5	845.82	2016	0
1816	OREGON	5	527.30	2016	0
1817	OREGON	5	527.30	2016	0
1818	OREGON	6	774.50	1980	36
1819	OREGON	6	1064.36	1987	29
1820	OREGON	6	1022.91	1987	29
1821	OREGON	6	1069.24	1987	29
1822	OREGON	6	522.73	1992	24
1823	OREGON	6	850.09	1994	22
1824	OREGON	6	491.64	1995	21
1825	OREGON	6	477.32	1995	21
1826	OREGON	6	649.83	1996	20
1827	OREGON	6	405.08	1997	19
1828	OREGON	6	640.38	1997	19
1829	OREGON	6	914.10	1997	19
1830	OREGON	6	904.65	1998	18
1831	OREGON	6	912.57	1998	18
1832	OREGON	6	784.25	1998	18
1833	OREGON	6	703.48	1998	18
1834	OREGON	6	821.74	1998	18
1835	OREGON	6	817.78	1998	18
1836	OREGON	6	455.68	1998	18
1837	OREGON	6	913.49	1998	18
1838	OREGON	6	592.23	1999	17
1839	OREGON	6	1006.45	2000	16
1840	OREGON	6	694.94	2000	16
1841	OREGON	6	644.04	2000	16
1842	OREGON	6	663.55	2000	16
1843	OREGON	6	802.84	2001	15
1844	OREGON	6	814.12	2001	15
1845	OREGON	6	974.14	2001	15
1846	OREGON	6	397.15	2002	14
1847	OREGON	6	788.52	2003	13
1848	OREGON	6	500.48	2003	13
1849	OREGON	6	876.00	2004	12
1850	OREGON	6	1005.84	2004	12
1851	OREGON	6	1068.63	2005	11
1852	OREGON	6	880.57	2005	11
1853	OREGON	6	353.87	2005	11
1854	OREGON	6	770.23	2005	11
1855	OREGON	6	234.39	2008	8
1856	OREGON	6	1202.44	2008	8
1857	OREGON	6	878.13	2009	7
1858	OREGON	6	1187.81	2012	4
1859	OREGON	6	762.00	2016	0
1860	OREGON	6	399.29	2016	0
1861	OREGON	6	349.00	2016	0
1862	OREGON	7	1218.29	1983	33
1863	OREGON	7	892.76	1991	25
1864	OREGON	7	729.08	1992	24
1865	OREGON	7	636.12	1994	22
1866	OREGON	7	722.99	1995	21
1867	OREGON	7	452.63	1996	20
1868	OREGON	7	628.80	1997	19
1869	OREGON	7	758.04	1997	19
1870	OREGON	7	830.88	1997	19
1871	OREGON	7	481.28	1998	18
1872	OREGON	7	899.46	1998	18
1873	OREGON	7	592.23	1999	17
1874	OREGON	7	611.12	1999	17
1875	OREGON	7	1108.56	2000	16
1876	OREGON	7	970.48	2001	15
1877	OREGON	7	1063.75	2004	12
1878	OREGON	7	975.66	2004	12
1879	OREGON	7	956.77	2004	12
1880	OREGON	7	791.57	2005	11
1881	OREGON	7	473.66	2005	11
1882	OREGON	7	546.51	2006	10
1883	OREGON	7	632.16	2006	10
1884	OREGON	7	439.22	2006	10
1885	OREGON	7	412.39	2006	10
1886	OREGON	7	448.06	2006	10
1887	OREGON	7	768.40	2007	9
1888	OREGON	7	482.80	2008	8
1889	OREGON	7	647.70	2008	8
1890	OREGON	7	627.58	2010	6
1891	OREGON	7	734.26	2011	5
1892	OREGON	7	869.90	2011	5
1893	OREGON	7	853.74	2012	4
1894	OREGON	7	729.69	2012	4
1895	OREGON	7	1150.01	2013	3
1896	OREGON	7	962.25	2015	1
1897	OREGON	7	340.46	2016	0
1898	OREGON	8	808.63	1995	21
1899	OREGON	8	413.92	1996	20
1900	OREGON	8	407.21	1996	20
1901	OREGON	8	477.32	1996	20
1902	OREGON	8	1020.78	1998	18
1903	OREGON	8	783.64	1998	18
1904	OREGON	8	1029.31	1998	18
1905	OREGON	8	1147.88	1998	18
1906	OREGON	8	752.25	1999	17
1907	OREGON	8	1017.12	1999	17
1908	OREGON	8	749.20	1999	17
1909	OREGON	8	1081.74	1999	17
1910	OREGON	8	608.99	2000	16
1911	OREGON	8	670.86	2000	16
1912	OREGON	8	824.79	2001	15
1913	OREGON	8	923.24	2004	12
1914	OREGON	8	532.49	2005	11
1915	OREGON	8	867.77	2005	11
1916	OREGON	8	729.69	2005	11
1917	OREGON	8	940.61	2005	11
1918	OREGON	8	1068.63	2005	11
1919	OREGON	8	350.52	2005	11
1920	OREGON	8	709.27	2005	11
1921	OREGON	8	593.75	2006	10
1922	OREGON	8	504.75	2006	10
1923	OREGON	8	351.13	2008	8
1924	OREGON	8	1093.01	2008	8
1925	OREGON	8	845.52	2012	4
1926	OREGON	8	738.23	2012	4
1927	OREGON	8	998.52	2015	1
1928	OREGON	8	1348.74	2016	0
1929	OREGON	8	1110.08	2016	0
1930	OREGON	9	614.17	1991	25
1931	OREGON	9	667.82	1992	24
1932	OREGON	9	649.53	1994	22
1933	OREGON	9	878.74	1995	21
1934	OREGON	9	878.74	1995	21
1935	OREGON	9	351.43	1996	20
1936	OREGON	9	407.52	1996	20
1937	OREGON	9	671.78	1998	18
1938	OREGON	9	894.89	1998	18
1939	OREGON	9	950.37	1999	17
1940	OREGON	9	770.84	2000	16
1941	OREGON	9	843.99	2000	16
1942	OREGON	9	1173.48	2004	12
1943	OREGON	9	357.23	2005	11
1944	OREGON	9	770.23	2005	11
1945	OREGON	9	1119.84	2005	11
1946	OREGON	9	703.78	2006	10
1947	OREGON	9	477.62	2006	10
1948	OREGON	9	431.90	2006	10
1949	OREGON	9	750.11	2010	6
1950	OREGON	9	730.30	2010	6
1951	OREGON	9	829.97	2011	5
1952	OREGON	9	655.02	2016	0
1953	OREGON	9	976.88	2016	0
1954	OREGON	10	614.17	1991	25
1955	OREGON	10	559.92	1992	24
1956	OREGON	10	713.23	1995	21
1957	OREGON	10	421.23	1996	20
1958	OREGON	10	395.63	1996	20
1959	OREGON	10	474.27	1997	19
1960	OREGON	10	904.04	1998	18
1961	OREGON	10	688.24	1998	18
1962	OREGON	10	818.08	1998	18
1963	OREGON	10	684.28	1998	18
1964	OREGON	10	1081.74	1999	17
1965	OREGON	10	690.07	1999	17
1966	OREGON	10	620.88	2000	16
1967	OREGON	10	677.27	2000	16
1968	OREGON	10	644.04	2000	16
1969	OREGON	10	735.18	2001	15
1970	OREGON	10	538.58	2001	15
1971	OREGON	10	1111.00	2004	12
1972	OREGON	10	1152.75	2004	12
1973	OREGON	10	413.31	2006	10
1974	OREGON	10	629.72	2008	8
1975	OREGON	10	1128.37	2008	8
1976	OREGON	10	1278.94	2011	5
1977	OREGON	10	875.39	2011	5
1978	OREGON	10	659.59	2012	4
1979	OREGON	10	1012.24	2016	0
1980	OREGON	10	1110.08	2016	0
1981	OREGON	11	587.65	1998	18
1982	OREGON	11	750.72	1998	18
1983	OREGON	11	610.21	1998	18
1984	OREGON	11	722.68	1998	18
1985	OREGON	11	825.40	1998	18
1986	OREGON	11	703.78	2000	16
1987	OREGON	11	729.08	2006	10
1988	OREGON	11	572.41	2007	9
1989	OREGON	11	455.37	2007	9
1990	OREGON	11	1171.96	2007	9
1991	OREGON	11	1345.08	2008	8
1992	OREGON	11	1132.64	2010	6
1993	OREGON	11	831.19	2010	6
1994	OREGON	12	1091.49	1985	31
1995	OREGON	12	444.40	1989	27
1996	OREGON	12	565.71	1989	27
1997	OREGON	12	585.22	1991	25
1998	OREGON	12	936.96	1998	18
1999	OREGON	12	360.27	2002	14
[truncated: 416 more rows]
